## Biophysical modeling of the neural origin of EEG and MEG signals

Solveig Næss<sup>a,\*</sup>, Geir Halmes<sup>b</sup>, Espen Hagen<sup>c</sup>, Donald J. Hagler, Jr.<sup>d</sup>, Anders M. Dale<sup>d,e</sup>, Gaute T. Einevoll<sup>b,c,\*</sup>, Torbjørn V. Ness<sup>b,\*\*</sup>

<sup>a</sup>*Department of Informatics, University of Oslo, Oslo, Norway*

<sup>b</sup>*Faculty of Science and Technology, Norwegian University of Life Sciences, Ås, Norway*

<sup>c</sup>*Department of Physics, University of Oslo, Oslo, Norway*

<sup>d</sup>*Department of Radiology, University of California, San Diego, CA, USA*

<sup>e</sup>*Department of Neurosciences, University of California, San Diego, CA, USA*

---

### Abstract

Electroencephalography (EEG) and magnetoencephalography (MEG) are among the most important techniques for non-invasively studying cognition and disease in the human brain. These signals are known to originate from cortical neural activity, typically described in terms of current dipoles. While the link between cortical current dipoles and EEG/MEG signals is relatively well understood, surprisingly little is known about the link between different kinds of neural activity and the current dipoles themselves. Detailed biophysical modeling has played an important role in exploring the neural origin of intracranial electric signals, like extracellular spikes and local field potentials. However, this approach has not yet been taken full advantage of in the context of exploring the neural origin of the cortical current dipoles that are causing EEG/MEG signals.

Here, we present a method for reducing arbitrary simulated neural activity to single current dipoles. We find that the method is applicable for calculating extracranial signals, but less suited for calculating intracranial electrocorticography (ECoG) signals. We demonstrate that this approach can serve as a powerful tool for investigating the neural origin of EEG/MEG signals. This is done through example studies of the single-neuron EEG contribution, the putative EEG contribution from calcium spikes, and from calculating EEG signals from large-scale neural network simulations. We also demonstrate how the simulated current dipoles can be used directly in combination with detailed head models, allowing for simulated EEG signals with an unprecedented level of biophysical details.

In conclusion, this paper presents a framework for biophysically detailed modeling of EEG and MEG signals, which can be used to better our understanding of non-invasively measured neural activity in humans.

---

\*correspondance: [gaute.einevoll@nmbu.no](mailto:gaute.einevoll@nmbu.no)

\*\*correspondance: [torbjorn.ness@nmbu.no](mailto:torbjorn.ness@nmbu.no)

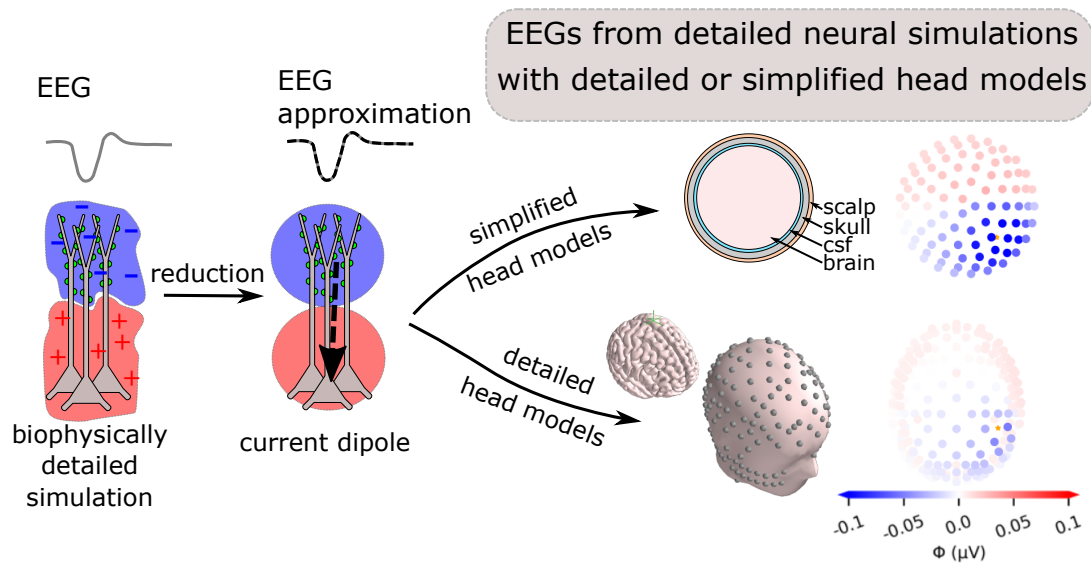

Graphical abstract.

## 1 Highlights

- Current dipoles are computed from biophysically detailed simulated neuron and network activity
- Extracted current dipoles allow for accurate computation of EEG and MEG signals in simplified and detailed head models
- Current-dipole approximation generally not suitable for accurate calculations of ECoG signals
- Method provides biophysics-based link between detailed neural activity and systems-level signals

## 1. Introduction

Electroencephalography (EEG) is one of the most important non-invasive methods for studying human cognitive function and diagnosing brain diseases [Cohen, 2017; Pesaran et al., 2018]. Yet, we know surprisingly little about the neural origin of these electric scalp potentials [Cohen, 2017]: On the one hand, we have a relatively good understanding of the biophysics of EEGs, in knowing that these signals originate from cortical current dipoles, and having a well-defined framework for linking such cortical dipoles to electric scalp potentials [Nunez and Srinivasan, 2006]. This has been taken advantage of for a long time in source localization, by inverse modeling of the underlying cortical current dipoles from EEG data. On the other hand, even though these cortical dipoles are assumed to mainly originate from large numbers of synaptic input to cortical pyramidal cell populations [Nunez and Srinivasan, 2006; Lopes da Silva, 2013; Pesaran et al., 2018; Ilmoniemi and Sarvas, 2019], the precise link between cortical dipoles and the underlying neural activity has remained unclear. In other words, we know very little about exactly which types of neural activity that cause even the most well-studied characteristics of the EEG signal, such as different types of oscillations (e.g., alpha, beta, and gamma waves) and stereotyped EEG shapes in response to sensory stimuli (event-related potentials, ERPs) [Cohen, 2017]. Importantly, these different EEG

25 characteristics are affected in predictable ways by various brain conditions, such as sleep and  
26 attention [Klimesch et al., 1998; Palva and Palva, 2011; Siegel et al., 2012], and by brain disorders  
27 including epilepsy and schizophrenia [Niedermeyer, 2003; Light and Näätänen, 2013; Freestone  
28 et al., 2015; Mäki-Marttunen et al., 2019a]. This means that a better insight into how different types  
29 of brain activity is reflected in cortical current dipoles could help us not only in making better inverse  
30 models for source localization, but also in providing a better understanding of the mechanisms of  
31 human cortical activity and possibly curing brain diseases [Uhlirva et al., 2016; Cohen, 2017;  
32 Mäki-Marttunen et al., 2019a].

33 The reasons why we lack understanding of the neural origin of EEG signals are many, the main  
34 being (i) strong ethical constraints on invasive human brain measurements and (ii) the high number  
35 of neurons that contribute to the signal. However, in recent years there have been major advances  
36 in several relevant branches of neuroscience, meaning that a better understanding of the EEG  
37 signal may now be within reach [Uhlirva et al., 2016; Cohen, 2017].

38 To bypass challenge (i), we look to the rapid development in the technology and methods used  
39 to study neural activity in lab animals. The possibility to control and manipulate neural activity, while  
40 simultaneously recording both intracranial signals like the local field potential (LFP) [Einevoll et al.,  
41 2007; Blomquist et al., 2009] and extracranial non-invasive signals like the EEG [Bruyins-Haylett  
42 et al., 2017], can be expected to make important contributions to our understanding of non-invasive  
43 measurements of human brain activity [Lopes da Silva, 2013; Uhlirva et al., 2016; Cohen, 2017;  
44 Pesaran et al., 2018]. Furthermore, detailed biophysical modeling of neural activity has become  
45 an important tool for understanding intracranial LFP measurements [Einevoll et al., 2013a; Pesaran  
46 et al., 2018]. Given that EEG is expected to reflect the same basic process as LFP, that is, large  
47 numbers of synaptic input to geometrically aligned pyramidal cells [Nunez and Srinivasan, 2006;  
48 Pesaran et al., 2018; Buzsáki et al., 2012], it seems likely that detailed biophysical modeling can  
49 also help shed light on the neural origin of EEG signals.

50 As indicated in challenge (ii), EEG signals are expected to reflect the activity of much larger neu-  
51 ral populations than the LFPs, making the simulations computationally demanding. Biophysically  
52 detailed large-scale simulations of neural networks have, however, been gaining substantial mo-  
53 mentum in recent years, thanks to large ongoing neuroscience initiatives like Project MindScope  
54 at the Allen Institute for Brain Science, the Blue Brain Project and the EU Human Brain Project  
55 [Einevoll et al., 2019]. The possibility to calculate EEG signals from such existing and future large-  
56 scale biophysically detailed neural simulations could lead to valuable insights into the neural origin  
57 of the EEG.

58 Another complicating aspect of EEG modeling, is that these predictions in general require a  
59 head model to account for the widely different electrical conductivities of the brain, cerebrospinal  
60 fluid (CSF), skull and scalp [Nunez and Srinivasan, 2006; Ilmoniemi and Sarvas, 2019]. While many  
61 such head models exist, they tend to take current dipoles as input [Nunez and Srinivasan, 2006;  
62 Pesaran et al., 2018], instead of the transmembrane currents that are available from biophysical  
63 neural simulations and that form the basis for modeling LFPs [Einevoll et al., 2013b].

64 Here, we introduce an approach for reducing arbitrary biophysically detailed simulated neural  
65 activity to current dipoles, which represents an enormous reduction in term of model complexity  
66 when computing brain signals. We verify that the approach gives accurate results when calculating  
67 EEG signals, but less so for intracranial electrocorticography (ECoG) signals. Next, we look into  
68 how the approach can be applied for investigating the origin of EEG signals, with a particular focus  
69 on calcium spikes, before demonstrating how our methods can be applied for pre-existing large-  
70 scale network models. Finally, we show how current dipoles can be combined with detailed head  
71 models, which enables simulation of EEG signals with unprecedented biophysical detail.

72 Note that the clear separation between calculation of current dipoles and the corresponding  
73 EEG is equally valid for magnetoencephalography (MEG) signals. While we here focus mostly on

74 EEG, the presented approach for calculating current dipoles from neural activity is equally valid  
75 for MEG signals, through use of an appropriate forward model [Hagen et al., 2018; Imoniemi and  
76 Sarvas, 2019].

## 77 2. Methods

78 Neural activity generates electric currents in the brain, which in turn create electromagnetic  
79 fields. In this section, we explain how electric brain signals can be modeled in both simple and  
80 more complex volume conductors.

### 81 2.1. Forward modeling of electric potentials

82 We assume negligible capacitive effects in the head [Pfurtscheller and Cooper, 1975; Ranta  
83 et al., 2017; Miceli et al., 2017] and that electric and magnetic signals effectively decouple. We  
84 can then apply the quasistatic approximation of Maxwell's equations for calculating these signals  
85 [Hämäläinen et al., 1993; Nunez and Srinivasan, 2006]. In other words, for computing extracellular  
86 electric potentials, we envision the head as a 3D volume conductor, and combining Maxwell's equa-  
87 tions with the current conservation law, we obtain the Poisson equation for computing extracellular  
88 potentials [Griffiths, 1999]:

$$\nabla \cdot \mathbf{J} = \nabla \cdot (\sigma \nabla \phi), \quad (1)$$

89 where  $\mathbf{J}$  is the electric current density in extracellular space,  $\sigma$  is the extracellular conductivity and  
90  $\phi$  is the extracellular electric potential. The Poisson equation can be solved analytically for simple,  
91 symmetric head models, such as an infinitely big space and spherically symmetric models. For  
92 more complex head models, numerical methods such as the Finite Element Method (FEM) can be  
93 used [Logg et al., 2012; Vorwerk et al., 2014; Haufe et al., 2015; Seo et al., 2016; Vorwerk et al.,  
94 2019].

#### 95 2.1.1. Compartment-based approach

96 Extracellular potentials generated by transmembrane currents can be calculated with a well-  
97 founded biophysical two-step forward-modeling scheme. The first step involves *multicompartmental*  
98 *modeling* and incorporates the details of reconstructed neuron morphologies for calculating trans-  
99 membrane currents [Sterratt et al., 2011]. In the second step, Equation (1) is solved under the  
100 assumption that the extracellular medium is an infinitely large, linear, ohmic, isotropic, homoge-  
101 neous and frequency-independent volume conductor. The transmembrane currents entering and  
102 escaping the extracellular medium can be seen as current sources and sinks, and give the extra-  
103 cellular potential  $\phi$  at the electrode location  $\mathbf{r}$ ,

$$\phi(\mathbf{r}) = \frac{1}{4\pi\sigma} \sum_{n=1}^N \frac{I_n}{|\mathbf{r} - \mathbf{r}_n|}, \quad (2)$$

104 where  $\mathbf{r}_n$  is the location of transmembrane current  $I_n$ ,  $N$  is the number of transmembrane currents  
105 and  $\sigma$  is the extracellular conductivity. This scheme is here referred to as the compartment-based  
106 approach, and was applied using the Python package LFPy 2.0 running NEURON under the hood  
107 [Hagen et al., 2018; Carnevale and Hines, 2006].

108 *2.1.2. Current dipole approximation*

109 Analogous to how electric charges can create charge multipoles, a combination of current sinks  
110 and sources can set up *current* multipoles [Nunez and Srinivasan, 2006]. From electrodynamics,  
111 we know that extracellular potentials from a volume of current sinks and sources can be precisely  
112 described by expressing Equation 2 as a multipole expansion [Nunez and Srinivasan, 2006]:

$$\phi(R) = \frac{C_{\text{monopole}}}{R} + \frac{C_{\text{dipole}}}{R^2} + \frac{C_{\text{quadrupole}}}{R^3} + \dots, \quad (3)$$

113 when the distance  $R$  from the center of the volume to the measurement point is larger than the  
114 distance from the volume center to the most peripheral source [Jackson, 1998]. In neural tissue,  
115 the current monopole contribution is zero due to current conservation, since the transmembrane  
116 currents sum to zero at all times [Koch, 1999; Pettersen et al., 2012]. Further, the quadrupole,  
117 octopole and higher order terms are negligible compared to the current dipole contribution when  $R$   
118 is sufficiently large. In this case, the extracellular potential from a neuron model can be estimated  
119 with the second term of the current multipole expansion; an approximation known as the *current*  
120 *dipole approximation* [Pettersen and Einevoll, 2008; Pettersen et al., 2014; Nunez and Srinivasan,  
121 2006]:

$$\phi(\mathbf{r}) = \frac{C_{\text{dipole}}}{R^2} = \frac{1}{4\pi\sigma} \frac{|\mathbf{p}| \cos \theta}{|\mathbf{r} - \mathbf{r}_p|^2}. \quad (4)$$

122 Here,  $\mathbf{p}$  is the current dipole moment in a medium with conductivity  $\sigma$ ,  $R = |\mathbf{R}| = |\mathbf{r} - \mathbf{r}_p|$  is the  
123 distance between the current dipole moment at  $\mathbf{r}_p$  and the electrode location  $\mathbf{r}$ , and  $\theta$  denotes the  
124 angle between  $\mathbf{p}$  and  $\mathbf{R}$ . The current dipole moment  $\mathbf{p}$  can be calculated from an axial current  $I$   
125 inside a neuron and the distance vector  $\mathbf{d}$  traveled by the axial current:  $\mathbf{p} = I\mathbf{d}$ , analogous to a  
126 charge dipole moment. The current dipole approximation is applicable in the far-field limit, that is  
127 when  $R$  is much larger than the dipole length  $d = |\mathbf{d}|$  [Nunez and Srinivasan, 2006].

128 *Multi-dipole approach.* From some multicompartmental neuron simulations (Figure 1-3), we com-  
129 puted multiple current dipole moments, i.e., one for each axial current flowing between neighboring  
130 compartments in the neuron:

$$\mathbf{p}_k = I_k^{\text{axial}} \mathbf{d}_k. \quad (5)$$

131 Here,  $I_k^{\text{axial}}$  is an axial current traveling along distance vector  $\mathbf{d}_k$ , resulting in a current dipole  
132 moment  $\mathbf{p}_k$ . By inserting all the current dipole moments from a neuron simulation into the cur-  
133 rent dipole approximation (Equation 4), we get a good estimate of the extracellular potential at  
134 any electrode location where the distance between the electrode and the nearest dipole is suffi-  
135 ciently large [Nunez and Srinivasan, 2006]. Note that the length of each (multi-)dipole is equal to  
136 half the length of its corresponding neuronal compartment. The calculation of multi-dipoles from  
137 simulated neural activity was implemented in LFPy 2.0, and can be used through the function  
138 `Cell.get_multi_current_dipole_moments` [Hagen et al., 2018].

139 *Single-dipole approximation.* From each multicompartmental neuron simulation, we computed one  
140 single current dipole moment. This can either be done by summing up the multiple current dipole  
141 moments,

$$\mathbf{p}(t) = \sum_{k=1}^M \mathbf{p}_k(t) = \sum_{k=1}^M I_k^{\text{axial}}(t) \mathbf{d}_k, \quad (6)$$

142 where  $M$  is the number of axial currents, or equivalently from a position-weighted sum of all the  
143 transmembrane currents [Lindén et al., 2010; Hagen et al., 2018]:

$$\mathbf{p}(t) = \sum_{k=1}^N I_k^{\text{trans}}(t) \mathbf{r}_k, \quad (7)$$

144 where  $N$  is the number of compartments in the multicompartmental neuron model and  $\mathbf{r}_k$  is the  
145 position of transmembrane current  $I_k^{\text{trans}}(t)$ . For calculating EEG signals a location for the current  
146 dipole must be chosen, and unless otherwise specified we positioned the dipole halfway between  
147 the position of the soma and the position of the synaptic input (for multiple synaptic inputs, we used  
148 the average position of the synaptic inputs). Note, however, that the large distance from the neuron  
149 to the EEG electrode ( $\sim 10$  mm) implies that the EEG signal is relatively insensitive to small changes  
150 in the dipole location within cortex. The calculation of current-dipole moments from simulated neural  
151 activity was implemented in LFPy 2.0, and can be used through `Cell.current_dipole_moment`  
152 [Hagen et al., 2018].

## 153 2.2. Head models

154 Electric potentials will be affected by the geometries and conductivities of the various parts of the  
155 head [Nunez and Srinivasan, 2006], which is especially important for electrode locations outside of  
156 the brain. This can be incorporated into our extracellular potential calculations by applying simplified  
157 or complex head models.

### 158 2.2.1. Four-sphere head model

159 The four-sphere head model is a simple analytical model consisting of four concentric shells  
160 representing brain tissue, cerebrospinal fluid (CSF), skull and scalp, where the conductivity can be  
161 set individually for each shell [Srinivasan et al., 1998; Nunez and Srinivasan, 2006], see Table 1  
162 for parameters used in this paper. The model solution is given in Næss et al. [2017] and is found  
163 by solving the Poisson equation subject to boundary conditions ensuring continuity of current and  
164 electric potentials over the boundaries, as well as no current escaping the outer shell. This model  
165 is based on the current dipole approximation.

|       | Radius (cm) | $\sigma$ (S/m) |
|-------|-------------|----------------|
| Brain | 7.9         | 0.3            |
| CSF   | 8.0         | 1.5            |
| Skull | 8.5         | 0.015          |
| Scalp | 9.0         | 0.3            |

**Table 1: Radii and electrical conductivities used in the four-sphere model.** The radius of each spherical shell in the four-sphere model, with  $\sigma$  denoting the respective electrical conductivities.

### 166 2.2.2. New York Head model

167 The New York Head model is a detailed head model based on high-resolution, anatomical  
168 MRI-data from 152 adult heads [Huang and Parra, 2015]. The model was constructed by taking  
169 advantage of the reciprocity theorem, stating that the position of the electrode and the dipolar  
170 source can be switched without affecting the measured potential [Rush and Driscoll, 1969]. This  
171 means, that virtually injecting current at the locations of the EEG electrodes and using the finite  
172 element method [Logg et al., 2012] to compute the resulting potential anywhere in the brain, gives  
173 the link between current dipoles in the brain and the resulting EEG signals [Malmivuo and Plonsey,

174 1995; Ziegler et al., 2014; Huang et al., 2016; Dmochowski et al., 2017]. This link was captured in  
175 a matrix known as the *lead field*  $\mathbf{L}$  [Nunez and Srinivasan, 2006]:

$$\mathbf{L} = \frac{\mathbf{E}}{I} \quad (8)$$

176 Here,  $I$  is the injected current at the electrode locations and  $\mathbf{E}$  is the resulting electric field in the  
177 brain. The lead field matrix gives us the precise link between a current dipole moment  $\mathbf{p}$  in the brain  
178 and the resulting EEG signals  $\Phi$  [Nunez and Srinivasan, 2006]:

$$\Phi = \mathbf{L} \cdot \mathbf{p}. \quad (9)$$

179 We applied the New York Head model by downloading the lead field  $\mathbf{L}$  from [parralab.org/nyhead/](http://parralab.org/nyhead/).  
180 The units incorporated in the lead field matrix was not immediately obvious. However, from Dmo-  
181 chowski et al. [2017]; Huang et al. [2013] it appears that an injected current  $I$  of 1 mA gives an  
182 electric potential  $E$  in V/m, meaning that a current dipole moment  $\mathbf{p}$  in the unit of mA·m gives EEG  
183 signals in the unit of V.

### 184 2.3. Simulation of neural activity

185 All neuron simulations were performed using the python package LFPy, running NEURON un-  
186 der the hood [Hagen et al., 2018]. For investigations of single-cell contributions to extracellular  
187 potentials, we applied three different morphologically reconstructed cell models: The human layer-  
188 2/3 pyramidal cell from Eyal et al. [2018], the layer-5 pyramidal cell from rat cortex constructed by  
189 Hay et al. [2011] and a rat layer-5 chandelier cell; an interneuron model developed by Markram  
190 et al. [2015].

191 The pyramidal cell models were downloaded from [senselab.med.yale.edu/modeldb/](http://senselab.med.yale.edu/modeldb/), with  
192 accession numbers 238347 (2013\_03\_06\_cell03\_789\_H41\_03) and 139653 (cell1) respectively,  
193 while we found the interneuron at the Neocortical Microcircuit Collaboration Portal ([bbp.epfl.ch/](http://bbp.epfl.ch/nmc-portal/microcircuit)  
194 [nmc-portal/microcircuit](http://nmc-portal/microcircuit)) under layer-5, Chandelier Cell (ChC), continuous Non-accomodating  
195 (cNAC), (rp110201\_L\_idA\_-\_Scale\_x1.000\_y0.975\_z1.000\_-\_Clone\_3).

196 For all simulations with passive ion channels only (Fig. 1-3), we used the following cell param-  
197 eters: membrane resistance of 30000  $\Omega\text{cm}^2$ , axial resistance of 150  $\Omega\text{cm}$  [Mainen and Sejnowski,  
198 1996] and a membrane capacitance of 1  $\mu\text{F}/\text{cm}^2$  [Gentet et al., 2000; Sterratt et al., 2011]. When  
199 active mechanisms were included in the simulations (Fig. 4), all cell properties were incorporated  
200 as described in the specific cell's documentation.

201 Neural simulations shown in Fig. 1-4 received synaptic input modeled as conductance-based,  
202 two-exponential synapses (Exp2Syn in NEURON). The rise time constant was set to 1 ms and the  
203 decay time constant was 3 ms, synaptic reversal potential was 0 mV and the synaptic weight was  
204 set to 0.002  $\mu\text{S}$ , unless otherwise specified.

205 For modeling of population activity (Figure 5, 6), we used the so-called hybrid scheme recently  
206 proposed by Hagen et al. [2016]. The simulation was unmodified from their presented results with  
207 transient thalamocortical input (their Fig. 1 and 7), except that all single-cell current dipole moments  
208 were recorded, and the EEG signals calculated.

### 209 2.4. Code availability

210 Simulation code to reproduce all figures in this paper is freely available from [https://github.](https://github.com/solveignaess/EEG.git)  
211 [com/solveignaess/EEG.git](https://github.com/solveignaess/EEG.git)

### 212 3. Results

213 We introduce an approach for modeling electroencephalography (EEG) and magnetoencephalog-  
214 raphy (MEG) signals from detailed biophysical multicompartment cell models. The approach in-  
215 volves two steps: First, current dipole moments are extracted from activity in neurons or networks.  
216 Second, the extracted current dipoles are used as sources in established forward models. Here we  
217 only demonstrate the approach by computing EEG signals, but the current dipoles are equally appli-  
218 cable for computing MEG signals using the appropriate magnetic-field forward models [Hämäläinen  
219 et al., 1993; Hagen et al., 2018; Ilmoniemi and Sarvas, 2019]. For illustration, we first consider EEG  
220 signals stemming from single synaptic input onto single neurons in an infinite homogeneous head  
221 model, before moving on to a simple, generic head model. Finally, we study EEGs from large-scale  
222 simulated network activity, also applying a detailed head model.

#### 223 3.1. At sufficiently large distances, extracellular potentials become dipolar

224 When modeling electric potentials within the brain, we can apply the well-established compart-  
225 ment-based approach assuming a homogeneous volume conductor (section 2.1.1) [Einevoll et al., 2013a;  
226 Holt and Koch, 1999]. However, this assumption is no longer valid when it comes to modeling  
227 EEG signals on the scalp, which calls for an inhomogeneous head model [Ilmoniemi and Sarvas,  
228 2019]. Such head models typically take current dipoles as input, as opposed to individual current  
229 sinks/sources, and must be based on the current dipole approximation [Nunez and Srinivasan,  
230 2006]. Here, we introduce an approach for computing current dipoles from arbitrary simulated neu-  
231 ral activity, and compare current-based and dipole-based modeling of electric potentials generated  
232 by a single cell receiving excitatory synaptic input. Excitatory synaptic input initiates a negative  
233 current at the synapse location, since positive ions flow into the cell. Due to current conserva-  
234 tion [Koch, 1999], this negative current is exactly balanced by spatially distributed positive currents  
235 along the cellular membrane, as illustrated in Fig. 1A for a single apical excitatory synaptic input  
236 to a passive human cortical layer-2/3 pyramidal cell model [Eyal et al., 2016]. See Methods 2.3  
237 for simulation details. In the standard procedure for modeling extracellular potentials, here referred  
238 to as the *compartment-based approach*, the transmembrane current in each cellular compartment  
239 corresponds to a point current source/sink. Another strategy is to consider the axial current of  
240 each cellular compartment as a small current dipole (see Equation (6)), which we refer to as the  
241 *multi-dipole approach* (Fig. 1B). By vector summation of all these dipoles into one single dipole at  
242 a specific position, we obtain the *single-dipole approximation* (Fig. 1C). For the sake of comparing  
243 these modeling approaches, we have assumed that the cell is positioned in an infinite homoge-  
244 neous electric medium. Very close to the neuron, the extracellular potential will strongly depend on  
245 the exact distribution of transmembrane currents across the cellular morphology and will, therefore,  
246 typically not take a purely dipolar shape (Fig. 1D,E versus F). However, since the dipole contribution  
247 will dominate when we are further away from the current sources (see Equation 3), the extracellu-  
248 lar potential becomes more and more dipolar with increasing distance from the cell [Lindén et al.,  
249 2010]. This implies that for the purpose of calculating extracellular potentials far away from the  
250 cell, the single-dipole approximation might be well justified (Fig. 1G-I). Note that there can be small  
251 differences between the results from the compartment-based and the multi-dipole approaches for  
252 electrode locations in the immediate vicinity of the current sources, due to the approximations in-  
253 herent in using the current dipole model (Fig. 1D versus Fig. 1E).



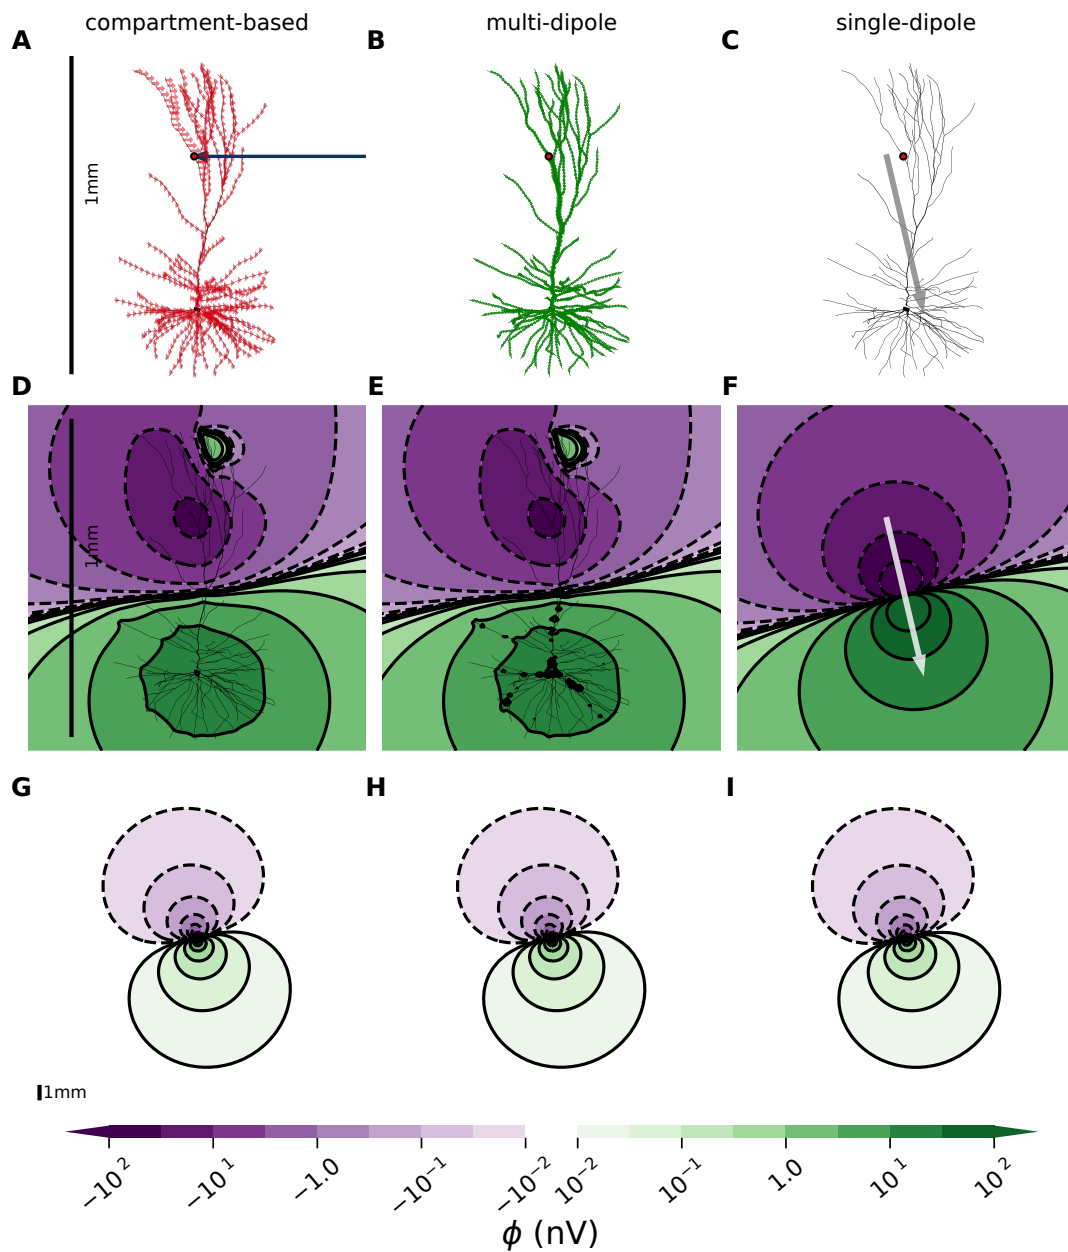

**Figure 1: Extracellular potentials become dipolar in the far field limit.** **A:** Passive layer-2/3 pyramidal cell from human [Eyal et al., 2016] with an excitatory, conductance-based, two-exponential synapse placed on apical dendrite (red dot), see Methods (2.3) for parameters. The resulting transmembrane currents for each compartment are shown as a blue arrow (input current) and red arrows (return currents). **B:** Green arrows represent the multiple current dipole moments between neighboring neural compartments. **C:** Gray arrow illustrates the total current dipole moment, that is, the vector sum of the dipoles in B. **D-F:** Extracellular potential in immediate proximity of the neuron, computed with the compartment-based approach, multi-dipole approach and single-dipole approximation, respectively. Note that the multi-dipole results differ slightly from the compartment-based approach when the distance from the measurement point to the nearest current dipole moment is short compared to the dipole length. **G-I:** Same as D-F, but at a larger spatial scale (zoomed out). See 1 mm scalebar in panel A, D and G. The colorbar is shared for panels D-I.

254 *3.2. Single-dipole approximation is justified for EEG, but not ECoG signals*

255 In order to test the applicability of the single-dipole approximation for calculating ECoG and  
256 EEG signals, we applied the four-sphere head model [Næss et al., 2017; Hagen et al., 2018, 2019].  
257 Since the four-sphere head model takes current dipoles as input, the multi-dipole approach was  
258 used as benchmark: an assumption that should be well justified for the cell-to-electrode distances  
259 considered, see section 3.1.

260 For different locations of a single excitatory synaptic input to a human cortical layer-2/3 pyra-  
261 midal cell model [Eyal et al., 2016] (Fig. 2A), we calculated the electric potential at point-electrode  
262 positions spanning from 100  $\mu\text{m}$  above the top of the cell, to the surface of the head, using both the  
263 multi-dipole approach and the single-dipole approximation (Fig. 2B). In the simulations shown, we  
264 used conductance-based synapses and included only passive membrane conductances, but we  
265 confirmed that using current-based synapses or a fully active cell model gave very similar results.

266 The electric potential decreased steeply with distance when crossing the different layers of  
267 the head model, most strongly across the low-conducting skull (Fig. 2B). For all synaptic input  
268 locations, we observed that the electric potential calculated with the single-dipole approximation  
269 markedly deviated from the multi-dipole approach directly above the neuron, but the difference  
270 strongly decreased with distance from the neuron (Fig. 2B, full versus dashed lines for two selected  
271 synapse locations). We quantified the model dissimilarities by looking at the relative error at the  
272 timepoint of the maximum current dipole moment, and for a chosen distal synaptic input the relative  
273 error was 40.0% and 1.06% at the position of the ECoG and EEG electrodes respectively (Fig. 2C,  
274 green line). For a specific proximal synaptic input we observed a relative error of 76.1% at the  
275 ECoG position, and 7.61% at the EEG position (Fig. 2C, purple line). Inserting a single strong  
276 synaptic current (synaptic weight 0.05  $\mu\text{S}$ ) into the soma of the same layer-2/3 pyramidal cell with  
277 active mechanisms [Eyal et al., 2018], resulting in a somatic spike, gave relative errors of 34.7%  
278 and 0.967% for the computed ECoG and EEG signals, respectively (results not shown). We found  
279 that calculating EEG signals with the single-dipole approximation gave relative errors peaking for  
280 synaptic locations  $\sim 60$  and  $400 \mu\text{m}$  above the soma (Fig. 2D), but note that these synaptic input  
281 locations also gave relatively weak EEG signals (Fig. 2E). This demonstrates that the relative error  
282 of the single-dipole approximation is negatively correlated with the amplitude of the scalp potential  
283 (Fig. 2F). This is as expected, given that the strongest EEG signals are expected to be caused by  
284 dipole-like source/sink distributions (section 2.1.2). In summary, the single-dipole approximation  
285 can result in substantial errors at the position of the ECoG electrodes, but gives small errors at the  
286 position of the EEG electrodes for synaptic locations leading to strong EEG signals.

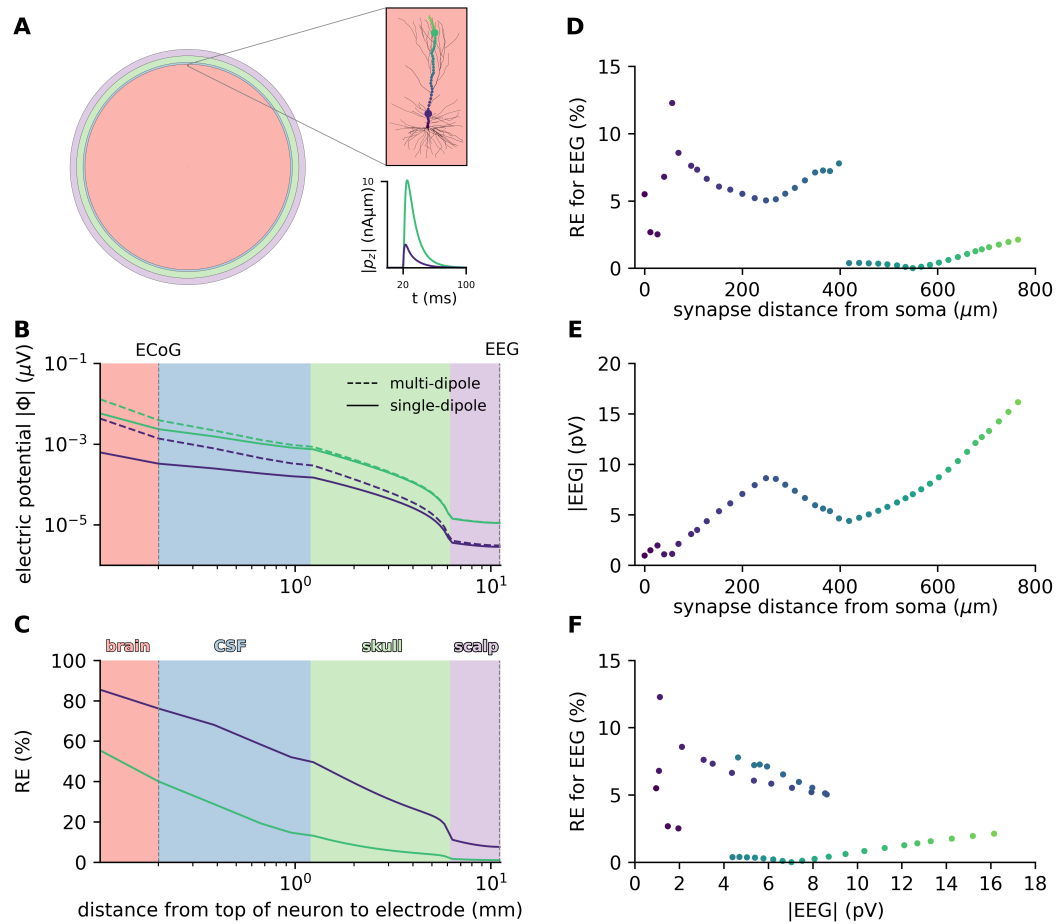

**Figure 2: Single-dipole approximation is justified for EEG but not ECoG signals.** **A**: Illustration of four-sphere head model, where the pink, blue, green and purple spherical shells represent the brain, CSF, skull and scalp respectively, see Table 1. The pink inset shows the human layer-2/3 neuron [Eyal et al., 2016] located in the brain, 78.9 mm above head center. 41 simulations lasting 100 ms with a single synaptic input after 20 ms to cell with passive ion channels only, were performed for varying input locations, see colored dots. The  $z$ -component of the resulting current dipole moments for two synaptic input locations (large colored dots) are shown in inset below as functions of time. The results presented in this figure are computed at the simulation time points producing the largest current dipole moment for each synaptic input location. **B**: Magnitude of extracellular potential  $|\phi|$  as function of distance from the top of the neuron, shown for two simulations with synaptic input locations marked by large colored dots in upper inset of A. In each simulation, we consider the time point with the largest current dipole moment. Dashed lines show extracellular potentials computed with multi-dipole, and full lines show single-dipole calculations. **C**: Relative error RE at EEG location comparing the single-dipole model to the multi-dipole model, as function of distance from top of neuron to measurement point. **D**: Relative error RE showing how single-dipole model deviates from multi-dipole model EEG calculations, as function of distance from soma to synapse location. **E**: Magnitude of EEG signal,  $|EEG|$ , as function of distance from soma to synaptic input location. **F**: Relative error, RE, showing how EEG calculations performed with the single-dipole approximation deviates from multi-dipole approach as a function of amplitude of the EEG signal,  $|EEG|$ .

287 **3.3. Single-dipole approximation simplifies estimate of EEG contribution**

288 In the previous section, we showed that the single-dipole approximation was applicable for  
289 calculation of EEG signals, and in this section we demonstrate that the single-dipole approximation  
290 can substantially simplify the analysis of the biophysical origin of EEG signals.

291 Pyramidal cells have a preferred orientation along the depth axis of cortex (here the  $z$ -axis),  
292 and the direction of the current dipole moment  $\mathbf{p}$  can be expected to align with this axis since  
293 radial symmetry will tend to make the orthogonal components ( $p_x, p_y$ ) cancel at the population  
294 level [Hagen et al., 2018]. In contrast, interneurons show much less of a preferred orientation,  
295 and are therefore expected to give a negligible contribution to the EEG signal, except indirectly  
296 through synaptic inputs onto pyramidal cells [Hagen et al., 2016]. We illustrated this by applying the  
297 single-dipole approximation to three different cell types (Fig. 3A), each receiving a large number of  
298 synaptic inputs with target regions on the cells set up to vary over time (Fig. 3B).

299 For the previously used human layer-2/3 cell (Fig. 3A, purple; Eyal et al. [2016]) receiving a  
300 volley of excitatory synaptic inputs that were restricted to the uppermost 200  $\mu\text{m}$  of the cell ( $t=50$  ms;  
301 Fig. 3B, purple dots), we observed a negative deviation of  $p_z$  (Fig. 3C, purple line). For basal  
302 synaptic input ( $t=100$  ms; Fig. 3B, purple line), the polarity of  $p_z$  was instead positive, but of slightly  
303 lower amplitude than for apical input, as can be expected because the large area of the somatic  
304 region will cause strong return currents in the immediate vicinity of the synaptic inputs, and therefore  
305 an overall weaker current-dipole moment.

306 A uniform distribution of 400 synaptic inputs across the cell membrane with area-weighted prob-  
307 ability ( $t=150$  ms; Fig. 3B, purple line), only gave rise to small ripples in  $p_z$ , due to the substantial  
308 cancellation of current dipoles of opposite polarity. It is sometimes assumed that excitatory input  
309 is relatively uniformly distributed onto pyramidal cells, while inhibitory input is more directed to the  
310 perisomatic region [Mazzoni et al., 2015; Teleńczuk et al., 2019; Skaar et al., 2020; Teleńczuk et al.,  
311 2020]. As expected, we found that this combination of uniformly distributed excitatory synaptic input  
312 and perisomatic inhibitory input gave rise to a clear negative response in  $p_z$  ( $t=200$  ms; Fig. 3B,  
313 purple line), which could be part of the explanation why inhibitory synaptic input in some cases has  
314 been found to dominate the LFP [Hagen et al., 2016; Teleńczuk et al., 2017].

315 For a rat cortical layer-5 pyramidal cell model (Fig. 3A, blue; Hay et al. [2011]), the resulting  
316 current dipole moment was very similar in shape, but larger in amplitude, which was expected  
317 because the longer apical dendrite will tend to give larger current dipole moments (Fig. 3C, blue  
318 line). Lastly, we used a rat cortical layer-5 interneuron model (Fig. 3A, green; Markram et al.  
319 [2015]), but since the dendrites of interneurons are not structured into the same distinctive zones  
320 as pyramidal cells, the synaptic input caused very small net current dipole moments.

321 We calculated the EEG signals with the four-sphere head model, using both the multi-dipole  
322 (Fig. 3D, dotted lines) and the single-dipole (Fig. 3D, solid lines) approach. To compare the ap-  
323 proaches, we computed the relative error over time, that is, the absolute difference between the  
324 results from the two approaches, normalized by the maximum EEG magnitude computed with the  
325 multi-dipole approach. The single-dipole approach gave a maximum error of 2.2%, 3.5% and 0.34%  
326 for the human layer-5 cell, the rat layer-5 cell and the rat interneuron, respectively. Importantly, the  
327 EEG signal is essentially fully described by the  $z$ -component of the current dipole moment  $p_z$ , that  
328 is, a single time-dependent variable. This reduction in signal description represents a massive sim-  
329 plification in the understanding of the biophysical origin of the EEG signal, compared to considering  
330 the transmembrane currents and position of each cellular compartment.

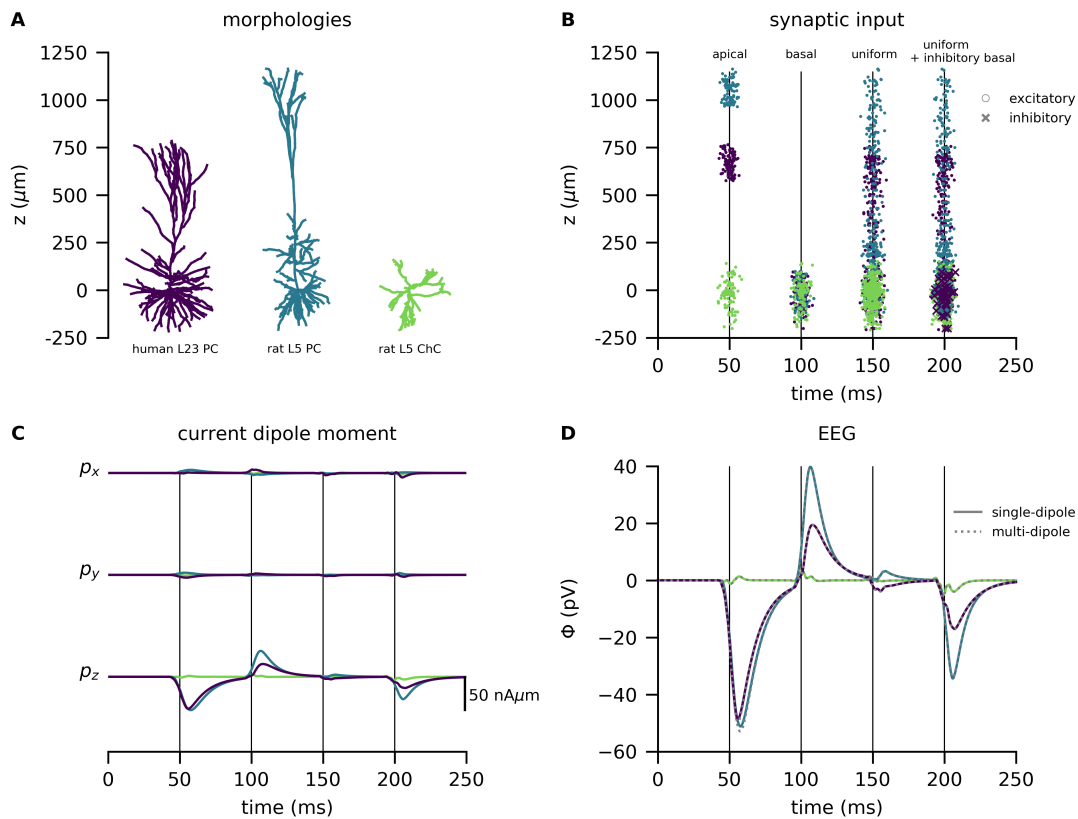

**Figure 3: EEG signals and current dipole moment from three different cell types with various synaptic input.** **A:** The morphologies of a human L2/3 pyramidal cell (purple; Eyal et al. [2016]), a rat L5 pyramidal cell (blue; Hay et al. [2011]), and a rat L5 interneuron (green; Markram et al. [2015]). The remaining panels display data connected to each cell type, see cell-specific colors. **B:** Each dot represents an excitatory synaptic input at a specific time (x-axis) at a specific height of the neuron (z-axis, corresponding to panel A) for a specific cell type (color). The crosses mark inhibitory synaptic input. The four input bulks represent 1) 100 apical excitatory synapses, 2) 100 basal excitatory input, 3) 400 homogeneously spread-out excitatory synapses and 4) 400 homogeneously spread-out excitatory synapse and inhibitory basal synapses. The synaptic weights sum to  $0.01 \mu\text{S}$  for all sets of excitatory/ inhibitory synapses in each wave (see sec. 2.3 for details). For the interneuron, which doesn't have typical "apical" or "basal" zones, the synapses were spread out all over the morphology for all input types. **C:** The  $x$ -,  $y$ - and  $z$ -components of the current dipole moment  $\mathbf{p}$  for the three different cell types. **D:** EEG signals,  $\phi$  from the three cell types computed with the four-sphere model.

### 331 3.4. Current dipole moment expose dendritic calcium spikes

332 Suzuki and Larkum [2017] recently demonstrated that dendritic calcium spikes can be recorded  
 333 experimentally at the cortical surface, and that the signal amplitudes can be similar to contributions  
 334 from synaptic inputs. This demonstrates that active conductances may play an important role in  
 335 shaping ECoG and EEG signals. Furthermore, it suggests that information about calcium dynamics  
 336 might be present in such signals, and that this information could potentially be taken advantage of  
 337 when studying learning mechanisms associated with dendritic calcium spikes [Suzuki and Larkum,  
 338 2017].

339 The previously introduced rat layer-5 cortical pyramidal cell model from Hay et al. [2011] can  
 340 exhibit dendritic calcium spikes. When this cell model received a single excitatory synaptic input

341 to the soma (Fig. 4A, blue dot), strong enough to elicit a somatic action potential (Fig. 4B1, blue),  
342 a small depolarization was also visible in the apical dendrite (Fig. 4B1, orange). Even so, this did  
343 not initiate any dendritic calcium spike. However, when combining the same somatic synaptic in-  
344 put with an additional excitatory synaptic input to the apical dendrite, 400  $\mu\text{m}$  away from the soma  
345 (Fig. 4A, orange dot), we observed a dendritic calcium spike. This calcium spike did, in turn, induce  
346 two additional somatic spikes (Fig. 4C1). For both synaptic input strategies described above, the  
347 extracellular potential simulated 30  $\mu\text{m}$  away from the soma took the shape of stereotypical extra-  
348 cellular action potentials: that is, a sharp negative peak followed by a broader and weaker positive  
349 peak (Fig. 4B2, C2). Further, we observed that the slow dendritic calcium spike was not reflected  
350 in the extracellular potential close to the soma (Fig. 4C2). We found that for the case with only a  
351 somatic spike and no calcium spike, the single-cell current dipole moment resembled the inverse of  
352 the extracellular potential (Fig. 4B3), while for the case with both somatic and dendritic spiking, a  
353 pronounced slow component was also present in the single-cell current dipole moment (Fig. 4C3).  
354 Somatic action potentials are typically not expected to contribute significantly to EEG signals (but  
355 see Teleńczuk et al. [2015]), because the very short duration of spikes with both a positive and  
356 a negative phase implies that extreme synchrony is needed for spikes to sum constructively, and  
357 spikes that are only partially overlapping tend to sum destructively. The same cannot be expected  
358 to hold for the calcium spikes, which are not only longer-lasting but also predominately cause a  
359 negative response in the current current dipole moment. To mimic a neural network scenario with  
360 multiple cells spiking at slightly different times, we calculated the sum of 1000 instances of the  
361 single-cell current dipole moment that was jittered (shifted) in time (normally distributed, standard  
362 deviation=10 ms). We found that the case with the dendritic calcium spike now had a 6.6-fold larger  
363 maximum amplitude than the case with only the somatic spike (Fig. 4 B4 versus C4,  $\max|p| =$   
364 30.8  $\mu\text{A}\mu\text{m}$  and 204.2  $\mu\text{A}\mu\text{m}$  respectively). This demonstrates that dendritic calcium spikes are  
365 much more capable of summing constructively for a population of cells, and substantiates the role  
366 of dendritic calcium spikes in affecting ECoG/EEG/MEG recordings.

367 The amplitude of the slow component of the current dipole moment from the calcium spike was  
368 about 0.5  $\mu\text{A}\mu\text{m}$  (Fig. 4C3), and later (Sec. 3.5) we will present results from a simulated neural  
369 network where the average event-related current dipole moment of layer 5 pyramidal cells were  
370 found to be about 0.1  $\mu\text{A}\mu\text{m}$  (Fig. 5D, bottom left). This indicates that our results are compatible  
371 with the claim by Suzuki and Larkum [2017] that signal amplitudes from calcium spikes could be  
372 similar in amplitude to contributions from synaptic input.

373 We can make a very rough estimate of the number of simultaneous calcium spikes required  
374 to cause a measurable EEG response: A current dipole moment of 1  $\mu\text{A}\mu\text{m}$  gives an EEG ampli-  
375 tude on the order of  $10^{-3}$   $\mu\text{V}$  (see for example Fig. 3 C,D, note different scales). Assuming that  
376 an EEG contribution must exceed  $\sim 10$   $\mu\text{V}$  to be detectable [Nunez and Srinivasan, 2006; Hagen  
377 et al., 2018] implies a minimum needed current dipole moment of  $\sim 10^4$   $\mu\text{A}\mu\text{m}$ . A number of per-  
378 fectly synchronous calcium spikes would each contribute with  $\sim 0.5$   $\mu\text{A}\mu\text{m}$  (Fig. 4C3), suggesting  
379 that about 20,000 synchronous calcium spikes would be needed to cause a measurable EEG re-  
380 sponse. Further, considering that the signal amplitude decreases by about 100-fold from cortical  
381 surface to scalp (Fig. 2B) and assuming a similar detection threshold, indicates that a few hundred  
382 simultaneous calcium spikes would be detectable by ECoG electrodes.

383 It might initially seem surprising that the dendritic calcium spike is so strongly reflected in the  
384 single-cell current dipole moment, given that the transmembrane currents associated with the so-  
385 matic action potential are much larger than those associated with the dendritic calcium spike: the  
386 maximum amplitude of the transmembrane currents of the somatic compartment was 45.1 nA,  
387 compared to just 0.30 nA for the compartment in the apical dendrite (Fig. 4A, blue and orange  
388 dots). However, the current dipole moment is given as the product between the amplitude of the  
389 current and the separation between the source and sink ( $p = Id$ ; Equation 6). While the currents

390 associated with the somatic action potential will for the most part be contained within the somatic  
 391 region, giving very small sink/source separations, the currents associated with the dendritic calcium  
 392 spike will be distributed over a much larger part of the cell membrane. This effect can be illustrated  
 393 by comparing the spatial profile of the extracellular potentials around the neuron at a snapshot in  
 394 time during a somatic spike or during a calcium spike (Fig. 4 D versus E).

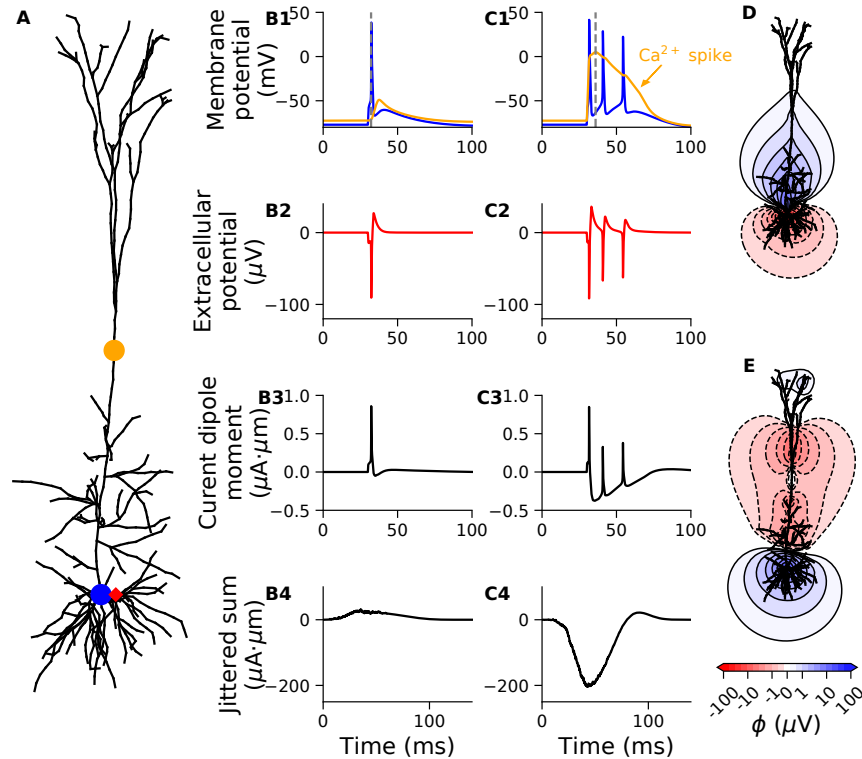

**Figure 4: Current dipole moment expose dendritic calcium spikes.** **A:** Layer-5 cortical pyramidal cell model from rat [Hay et al., 2011], receiving either a single excitatory synaptic input to the soma evoking a single somatic action potential (blue dot, results in B1-4), or in addition an excitatory synaptic input to the apical dendrite, evoking a dendritic calcium spike and two additional somatic spikes (orange dot, results in C1-4). **B1, C1:** Membrane potential at the two positions indicated in A. **B2, C2:** Extracellular potential 30  $\mu\text{m}$  away from the soma (red diamond in A), assuming for illustration an infinite homogeneous extracellular medium. **B3, C3:** Single-cell current dipole moment. **B4, C4:** Sum of 1000 instances of the single-cell current dipole moment (from B3, C3), that has been randomly shifted in time with a normally distributed shift with a standard deviation of 10 ms. **D:** Contour lines of extracellular potential around neuron at a snapshot in time during the somatic spike in B1 ( $t=32.2$  ms; time marked by dashed line). **E:** Contour lines of extracellular potential around neuron at a snapshot in time during the calcium spike in C1 ( $t=36.0$  ms; time marked by dashed line). The synaptic weight was 0.07 and 0.15  $\mu\text{S}$  for the somatic and apical input location, respectively.

### 395 3.5. EEG from large-scale neural network simulations

396 So far, we have only considered EEG contributions from single cells, but real EEG signals  
 397 are expected to reflect the activity of hundreds of thousands to millions of cells [Nunez and Srinivasan, 2006; Cohen, 2017]. Biophysically detailed modeling of large populations is still in its infancy  
 398 [Einevoll et al., 2019] and at present typically include “only” a few tens of thousands of biophysically  
 399 detailed cells [Markram et al., 2015; Billeh et al., 2020]. Networks of point neurons, on the other  
 400

401 hand, are regularly used to simulate hundreds of thousands [Billeh et al., 2020] or even millions  
402 of cells [Senk et al., 2018; Schmidt et al., 2018], but LFP, ECoG, EEG or MEG signals can not be  
403 computed directly from point neurons [Einevoll et al., 2013a]. To investigate EEG signals generated  
404 by neuronal networks, we therefore used a hybrid scheme [Hagen et al., 2016; Senk et al., 2018;  
405 Skaar et al., 2020], where the network activity is first simulated in a highly computationally efficient  
406 manner with point neurons in NEST [Linssen et al., 2018] and the resulting spiking activity of each  
407 neuron saved to file. Afterwards, each cell is modeled with biophysically detailed multicompartment  
408 morphologies and the stored spikes of all the presynaptic neurons are used as activation times for  
409 synaptic input onto these neurons in a simulation where the extracellular potentials are calculated  
410 [Hagen et al., 2016; Senk et al., 2018].

411 We used the large-scale point-neuron cortical microcircuit model from Potjans and Diesmann  
412 [2014]; Hagen et al. [2016], which has  $\sim 80\,000$  neurons divided into 8 different cortical popula-  
413 tions, one excitatory and one inhibitory, across four layers (L2/3 - L6), and can exhibit a diverse  
414 set of spiking dynamics including different oscillations and asynchronous irregular network states  
415 [Hagen et al., 2016; Brunel, 2000]. We chose the scenario with transient thalamocortical input, and  
416 the only difference from the original simulation by Hagen et al. [2016] was the added calculation of  
417 current dipole moments and EEG signals. We simulated transient thalamic synaptic input to layers  
418 4 and 6 (Fig. 5A), and after the spikes had been mapped onto the multicompartment cell models  
419 (Fig. 5B), we calculated the LFP (Fig. 5C) similarly to Hagen et al. [2016] (their Fig. 1), in addition  
420 to the current dipole moments of each cell.

421 For all cell populations, we found that the current dipole moments from individual cells could  
422 show large transient responses to thalamic input (Fig. 5D; gray lines show current dipole moment  
423 from individual cells in two example populations: L5 inhibitory (L5I) and L5 excitatory (L5E)), but  
424 for all inhibitory populations the thalamic response was not visible in the average current dipole  
425 moment (Fig. 5D; black lines, L5I). The same was true for the current dipole moment components  
426 perpendicular to the depth axis for excitatory populations (Fig. 5D; L5E,  $p_x$ ,  $p_y$ , black lines), but not  
427 for the component along the depth axis which had a substantial average response to the thalamic  
428 input (Fig. 5D; L5E,  $p_z$ , black line). These observations imply, as previously noted, that only the  $z$ -  
429 component of the current dipole moment from excitatory populations can be expected to contribute  
430 significantly to the EEG signal.

431 Our findings invite a simplified approach to calculate the EEG signal: Instead of calculating all  
432 single-cell EEG contributions and summing them (taking into account the position of the individual  
433 cells, similarly to what is done for the LFP signal), we can compute a single summed  $p_z$ -component  
434 from all neurons in each pyramidal cell population, place it in the center of the population column,  
435 and calculate the resulting simplified EEG signal. This approximation can be expected to be reason-  
436 able when the population radius is small compared to the distance from the population center to  
437 the EEG electrode. Note that the distance from the top of cortex to the top of the head is typically  
438  $\sim 10$  mm, while the radius of the present simulated population is only  $\sim 0.5$  mm (Fig. 5; population  
439 outline in B is drawn in red in E). Indeed, when we combined the current dipole moments with the  
440 four-sphere head model (Fig. 5E), we found that the full EEG signal that was calculated as the sum  
441 of the EEG contribution from each of the  $\sim 80\,000$  cells at their respective positions, was in fact  
442 indistinguishable from the simplified EEG signal (Fig. 5F). This implies that the EEG signal from  
443 the simulated cortical activity can be fully represented by a single time-dependent variable for each  
444 pyramidal cell population.

445 We also compared the relative amplitude of the EEG signal from each population, and found  
446 that for the present example, the excitatory population of L2/3 was the dominant source of the EEG  
447 signal (Fig. 5F). Note, however, that we expect this observation to be somewhat model-dependent,  
448 and that strong general claims about the contribution of different pyramidal cell populations to the  
449 EEG signal cannot be made from this example study alone.



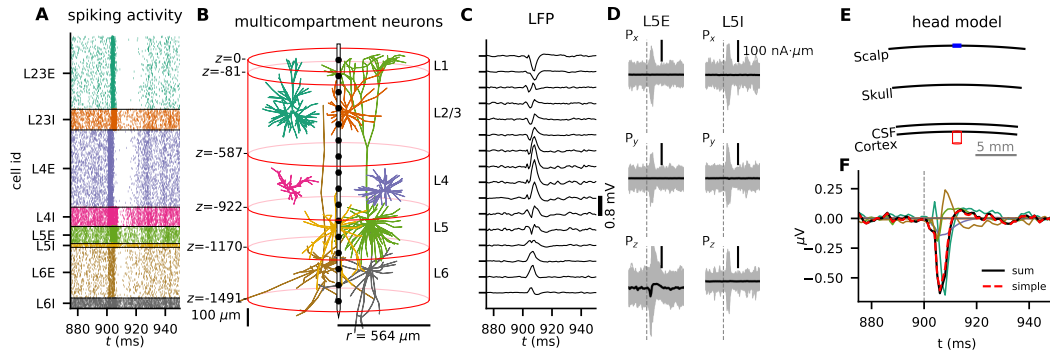

**Figure 5: Large-scale neural simulations can be used to probe biophysical origin of EEG signals. A:** Stimulus-evoked spiking activity from thalamic input (time  $t = 900$  ms, denoted by thin vertical line) in the cortical microcircuit model from Potjans and Diesmann [2014]. Dots indicate spike times of individual neurons, and populations are represented in different colors (I=inhibitory, E=excitatory). **B:** Multicompartment model neurons used to produce the measurable signals, with colors corresponding to panel A, showing one example morphology per population. Layer boundaries are marked at depths relative to cortical surface,  $z = 0$ . A laminar recording electrode with 16 contacts separated by  $100 \mu\text{m}$  (black dots) is positioned in the center of the population. **C:** LFPs calculated at depths corresponding to black dots in B. **D:** For the two L5 populations (L5I and L5E), the three components of the current dipole moment is shown for all individual cells (gray), together with the population average (black). **E:** Illustration of the four-sphere head model, with the red column corresponding to the outline of the population in panel B. **F:** The EEG signal from each population found by summing the single-cell EEG contribution of all individual cells within each population (different colors, same color scheme as in A,B), together with the total summed EEG signal (black). The simplified EEG signal was found by first summing the  $z$ -component of the current dipole moments for all pyramidal cells, that is L2/3E, L5E and L6E, and calculating the EEG from this single current dipole (red dashed).

### 3.6. Dipole approximation in complex head models

Even though the four-sphere head model is convenient for generic EEG studies, many applications such as accurate EEG source analysis, may require more detailed head models [Dale et al., 1999; Vorwerk et al., 2014]. The construction of such complex head models is dependent on expensive equipment, that is magnetic resonance imaging (MRI), to map the electrical conductivity of the entire head at resolutions of  $\sim 0.5\text{-}1.0 \text{ mm}^3$  [Huang and Parra, 2015; Huang et al., 2016]. Afterwards, numerical techniques such as the Finite Element Method (FEM) [Logg et al., 2012] can be used to calculate the signal at the EEG electrodes for arbitrary arrangements of current dipoles in the brain, but at a high computational cost. The number of computing hours is, however, reduced by applying the reciprocity principle of Helmholtz. The reciprocity principle states, in short, that switching the location of a current source and a recording electrode will not affect the measured potential [Malmivuo and Plonsey, 1995; Ziegler et al., 2014; Huang et al., 2016; Dmochowski et al., 2017]. This implies that it suffices to use FEM to calculate the lead field in the brain from virtual current dipoles placed at each of the EEG electrodes. From the lead field matrix, we can infer the potential at the EEG electrodes, given an arbitrary arrangement of current dipoles in the brain. Luckily, several such pre-solved complex head models are freely available, and one example is the *New York Head* (NYH) (Fig. 6A), which we have applied here (Huang et al. [2016]; [parralab.org/nyhead/](http://parralab.org/nyhead/)).

To illustrate the use of pre-solved complex head-models, we inserted the current dipole moment obtained from the cortical column model in section 3.5 into the New York Head model (Fig. 6A), at two manually chosen positions: one in the parietal lobe, and one in the occipital lobe, see stars in Fig. 6C, E, respectively. In both cases, the current dipole moment was oriented along the normal vector of the brain surface, and the EEG signal was calculated. For comparison with a simplified head model, we inserted the same current dipole moment into the four-sphere head model (Fig. 6B)

473 at locations comparable to the dipole positions chosen in the occipital and parietal lobe in the NYH  
474 model: the locations in the four-sphere model were chosen close to the brain surface, such that  
475 the distance from dipole position to the closest electrode (Fig. 6D, F, stars) and the brain surface  
476 normal vectors were similar to the respective positions in the NYH model.

477 The computed EEG signals from the two head models were in this case relatively comparable  
478 in both spatial shape and amplitude (Fig. 6C-F). The two head models also generated EEG signals  
479 of the same temporal shape, as expected, but while the four-sphere head model gave very similar  
480 EEG amplitudes for the two different dipole locations, the EEG amplitudes from the complex head  
481 model was much more variable, even for similar distances to the closest electrode (Fig. 6G, H).

482 The higher variability of the complex head model was also apparent in the decay of the maxi-  
483 mum EEG amplitude with distance, which was perfectly smooth, exponential-like [Nunez and Srini-  
484 vasan, 2006], and very similar for the two locations in the four-sphere model, but very variable for  
485 the complex head model, although with the same general shape (Fig. 6I, J).

486 Note that despite the complexity, the NYH model is substantially faster than the four-sphere  
487 model. In order to simulate the EEGs from a dipole moment vector containing 1200 timesteps, the  
488 NYH model execution times were  $\sim 0.4$  s, while the four-sphere model needed  $\sim 1.5$  s.

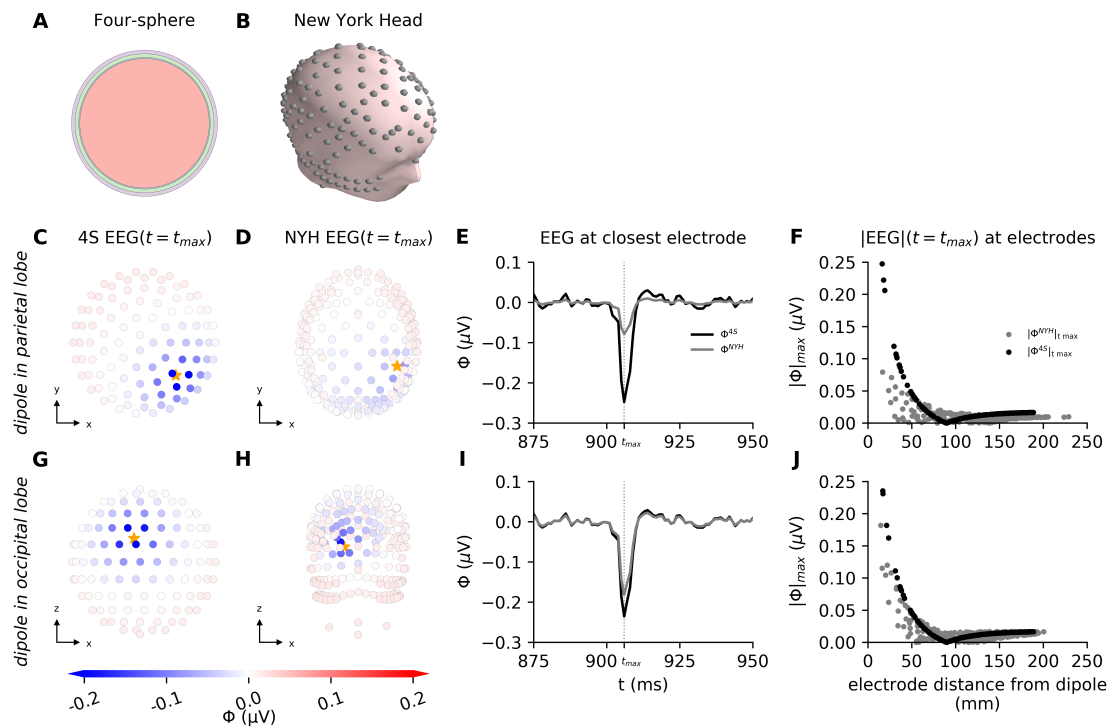

**Figure 6: EEG signals from cortical column network can be modeled with the four-sphere model and the New York Head.** EEG signals from population dipole resulting from waves of synaptic input to the cortical microcircuit model from Potjans and Diesmann [2014]. Population dipole was placed in two different locations: parietal lobe (C,D,E,F) and occipital lobe (G,H,I,J). **A:** The four-sphere model consisting of four concentric shells: brain tissue, CSF, skull and scalp. **B:** The New York Head model. **C, D:** EEG signals ( $\phi$ ) on scalp surface electrodes, seen from above, showing time point of the strongest current dipole moment  $|\mathbf{p}|$  of the population simulation. Dipole is placed in the parietal lobe and location is marked by orange star, having the following coordinates in the NYH model: (55, -49, 57) mm. EEG signals were computed with the New York Head model (C) and the four-sphere head model (D). **E:** EEG trace computed with the four-sphere model (black) and the New York Head model (gray) on closest scalp surface electrode: i.e. the electrode with the shortest distance to the current dipole moment location. Dipole is placed in parietal lobe (distance is 16.13 mm for the four-sphere model and 16.76 mm for NYH). **F:** Absolute value of EEG signals from panel C,D generated by dipole in parietal lobe, plotted as function of distance from dipole to measurement electrode. **G,H:** Equivalent to panel C,D, however, dipole is placed in occipital lobe, and electrodes are seen from the back of the head. Dipole coordinates for NYH model: (-24.3, -105.4, -1.2) mm. **I:** EEG trace from dipole in occipital lobe computed on closest electrode (distance is 16.90 mm for the four-sphere model and 14.64 mm for NYH), equivalent to panel E. **J:** Equivalent to panel F, with EEG signals from panel G,H generated by dipole in occipital lobe.

## 489 4. Discussion

### 490 4.1. Summary

491 In this paper, we have introduced an approach for reducing arbitrary simulated neural activity  
 492 from biophysically detailed neuron models to single current dipoles (Fig. 1). We verified that the ap-  
 493 proach was applicable for calculating EEG, but generally not for ECoG signals (Fig. 2-3), and gave  
 494 examples of how reducing neural activity to a single dipole can be a powerful tool for investigating  
 495 and understanding single-cell EEG contributions (Fig. 3-4). Furthermore, we demonstrated that

496 the presented approach could easily be integrated with existing large-scale simulations of neural  
497 activity. Moreover, we showed how single dipoles are useful for constructing compact represen-  
498 tations of the EEG contributions from entire neural populations, with methods still firmly grounded  
499 in the underlying biophysics (Fig. 5). Finally, we demonstrated how the simulated current dipoles,  
500 from single cells or large neural populations, can be directly inserted into complex head models for  
501 calculating more realistic EEG signals (Fig. 6).

#### 502 *4.2. Application of current dipoles for computing EEG, MEG and ECoG signals*

503 We have highlighted that the calculation of current dipoles from neural activity is cleanly sep-  
504 arated from the calculation of the ensuing EEG signals. Since MEG sensors like EEG electrodes  
505 are positioned far away from the neural sources, the same is true for MEG signals. The calculated  
506 current dipoles can therefore also be used in combination with simplified or detailed frameworks  
507 for calculation of MEG signals, for example by following methods outlined in [Hagen et al. \[2018\]](#);  
508 [Ilmoniemi and Sarvas \[2019\]](#).

509 ECoG electrodes are in general positioned closer to the neural sources. For our example simu-  
510 lations of the ECoG signal generated by individual neurons, we found that use of the single-dipole  
511 approximation gave substantial errors (Fig. 2). Thus for computation of ECoG signals, the standard  
512 compartment-based formalism or the multi-dipole approach (Fig. 1) requiring much more compu-  
513 tational resources, may be required. Here an alternative to using full head models is to use the  
514 method of images, taking into account the discontinuity of electrical conductivity at the cortical sur-  
515 face [[Pettersen et al., 2006](#); [Hagen et al., 2018](#)]. Note that while we here used LFPy 2.0 [[Hagen  
516 et al., 2018, 2019](#)], a python interface to NEURON [[Carnevale and Hines, 2006](#)], calculation of  
517 current dipole moments can easily be implemented into any framework where the transmembrane  
518 currents are available, through the simple formula given in eq. (7).

#### 519 *4.3. Generalization to non-compartmental models*

520 EEG and MEG recordings reflect neural activity at the systems-level [[Pesaran et al., 2018](#);  
521 [Einevoll et al., 2019](#)]. Here, we have focused on calculating current dipoles from detailed multi-  
522 compartment neuron models, but neural modeling at the systems-level is often based on higher  
523 levels of abstraction, like point neurons [[Linssen et al., 2018](#)] or firing rate populations [[Sanz-Leon  
524 et al., 2013](#)]. Calculation of electric or magnetic signals from such higher-level neural simulations  
525 must in general rely on some kind of approximation trick, since neurons require a spatial structure  
526 to be capable of producing electromagnetic signals [[Einevoll et al., 2013a](#)]. One such trick that we  
527 took advantage of here is the hybrid scheme [[Hagen et al., 2016](#)]. This two-step scheme involves  
528 neural network activity first being simulated by point neurons, before the resulting spike trains are  
529 replayed onto multi-compartment neuron models for calculating LFP and EEG signals (sec. 3.5;  
530 Fig. 5).

531 Further, the hybrid scheme can be generalized to also allow for calculation of EEG/MEG signals  
532 from firing-rate models by using the so-called kernel method, which has previously been success-  
533 fully applied to the LFP [[Hagen et al., 2016](#); [Skaar et al., 2020](#); [Teleńczuk et al., 2020](#)]. In practice,  
534 this can be done in two steps: First, simultaneously activating all outgoing synapses from a specific  
535 (presynaptic) simulated population, and recording the total current dipole moment of the response  
536 (the kernel) [[Hagen et al., 2016](#)]. Second, computing the EEG/MEG contribution stemming from  
537 this (presynaptic) population by convolving the kernel with the population firing rate, and applying  
538 an appropriate forward model. Here, the firing rate would be obtained separately in point neuron  
539 network models or firing-rate models. In this way, the basic biophysics of EEG and MEG signals  
540 from synaptic activation of multi-compartment neuron models is included, avoiding, however, com-  
541 putationally heavy multicompartmental modeling of spiking dynamics. The calculated current-dipole  
542 kernels should be applicable for different kinds of input to the original network model, but would in  
543 general have to be recomputed for changes to cell or synaptic parameters.

#### 544 4.4. Connection to other work

545 Calculation of current dipole moments from morphologically complex cell models has been pur-  
546 sued before, for example to study the EEG and MEG contribution of spiking single cells [Murakami  
547 and Okada, 2006], or to study how the synaptic input location affects the current dipole [Lindén  
548 et al., 2010; Ahlfors and Wreh II, 2015]. Important work on EEG interpretation in terms of the  
549 underlying neural activity has also previously been done through use of "minimally sufficient" bio-  
550 physical models, see for example Murakami et al. [2002, 2003]; Jones et al. [2007, 2009]; Sliva et al.  
551 [2018]; Neymotin et al. [2020]. Here, "minimally sufficient" means that the cell models only had min-  
552 imally needed multi-compartment spatial structure (point neurons cannot produce current dipole  
553 moments), only considered a few cell types, and employed simple synaptic connection rules. In  
554 particular, the Human Neocortical Neurosolver (HNN) [Neymotin et al., 2020] enables researchers  
555 to link measured EEG or MEG recordings to neural activity through a pre-defined canonical neo-  
556 cortical column template network. HNN comes with an interactive GUI, designed for users with  
557 little or no experience in computational modeling, and might therefore be an appropriate choice  
558 for researchers seeking to gain a better understanding of their EEG/MEG data. However, while  
559 the use of such minimally sufficient models allows for quick and direct comparison between simu-  
560 lated and recorded EEG signals, it is not (presently) compatible with simulating EEG or MEGs from  
561 biophysically detailed single cell- or network models, constructed from detailed experimental data  
562 [Reimann et al., 2013; Egger et al., 2014; Markram et al., 2015; Hagen et al., 2016; Gratiy et al.,  
563 2018; Arkhipov et al., 2018; Billeh et al., 2020].

564 A more high-level approach for simulating MEG/EEG signals from the underlying neural activity  
565 has been pursued through neural field or neural mass models [Jirsa et al., 2002; David and Friston,  
566 2003; Coombes, 2006; Deco et al., 2008; Bojak et al., 2010; Ritter et al., 2013], which aim to model  
567 the evolution of coarse-grained variables such as the mean membrane potential or the firing rate  
568 of neuron populations. Such coarse-graining drastically reduces the number of parameters and the  
569 computational burden of the simulation, and can be used to study the interplay among entire brain  
570 regions, and indeed run whole-brain simulations. The Virtual Brain (TVB) is an excellent example  
571 of a software for whole-brain network simulations [Sanz-Leon et al., 2013, 2015; Ritter et al., 2013],  
572 where detailed and potentially personalized head models can be combined with tractography-based  
573 methods identifying the connectivity between brain regions [Sanz-Leon et al., 2013]. To calculate  
574 measurement modalities like MEG and/or EEG signals from neural field or neural mass models,  
575 it is typically assumed that the population current dipole moments are roughly proportional to, for  
576 example, the average excitatory membrane potential [Bojak et al., 2010; Ritter et al., 2013]. Further,  
577 EEGs can be calculated from the resulting current dipole moments in combination with head models  
578 as presented in this paper, or through other softwares or techniques [Gramfort et al., 2014]. This  
579 suggests an intriguing future development, where one could apply the above-mentioned kernel  
580 method based on biophysically detailed neuron models to substantially increase the accuracy of  
581 LFP, EEG and MEG predictions from high-level large-scale simulations of neural activity.

#### 582 4.5. Outlook

583 EEG and, later, MEG signals have been an important part of neuroscience for a long time, but  
584 still very little is known about the neural origin of the signals [Cohen, 2017]. A better understanding  
585 of these signals could lead to important discoveries about how the brain works [Lopes da Silva,  
586 2013; Uhlirva et al., 2016; Pesaran et al., 2018; Ilmoniemi and Sarvas, 2019], and provide new  
587 insights into mental disorders [Mäki-Marttunen et al., 2019a; Sahin et al., 2019]. This work lays  
588 some of the foundation for obtaining a better understanding of EEG/MEG recordings, by allowing  
589 easy calculation of the signals from arbitrary neural activity. The presented formalism is well suited  
590 for modeling EEG/MEG contributions from various potential neural origins, including different cell  
591 types, different ion channels and different synaptic pathways. For example, to study the effect of

592 calcium spikes [Suzuki and Larkum, 2017],  $I_h$  currents [Ness et al., 2016, 2018; Kalmbach et al.,  
593 2018], or gene expression on EEG signals [Mäki-Marttunen et al., 2019b], one only needs to know  
594 how the  $z$ -component of the resulting population current dipole is affected. This decoupling of the  
595 current dipole moment and head model allows for easier investigation and improved understanding  
596 of the origin of the EEG/MEG signal.

597 EEG/MEG measurements are often used for source localization, aiming to identify the under-  
598 lying cortical current dipoles [Nunez and Srinivasan, 2006; Gramfort et al., 2014; Ilmoniemi and  
599 Sarvas, 2019]. However, such reconstructed current dipoles are generic in the sense that they are  
600 typically not intended to represent specific neural populations. By allowing for calculation of current  
601 dipoles from cortical populations, the work presented here takes a step towards consolidating the,  
602 so far, mostly separate scientific disciplines of neural modeling and EEG/MEG data analysis (but  
603 see also Neymotin et al. [2020]).

604 While there are many examples of detailed biophysical modeling of neural activity improving  
605 interpretation of measured intracranial extracellular potentials in lab animals [Einevoll et al., 2007;  
606 Blomquist et al., 2009; McColgan et al., 2017; Luo et al., 2018; Chatzikalymniou and Skinner, 2018;  
607 Teleńczuk et al., 2019], much less has been done for human EEG/MEG signals. This is natural  
608 given that studies of healthy human brains necessarily are limited to non-invasive technologies  
609 [Lopes da Silva, 2013; Uhlirova et al., 2016; Cohen, 2017]. However, given all the valuable insights  
610 that could be gained from an increased understanding of non-invasive measurements of neural  
611 activity in humans, an important challenge in modern neuroscience is to build on the mechanistic  
612 insights from animal studies and use them for understanding non-invasive signals in humans [Lopes  
613 da Silva, 2013; Uhlirova et al., 2016; Cohen, 2017; Einevoll et al., 2019; Mäki-Marttunen et al.,  
614 2019a]. The approach for calculating EEG/MEG signals in this paper should therefore ideally be  
615 used in combination with animal studies simultaneously measuring multisite laminar LFP (and MUA)  
616 signals within cortex, as well as EEG/MEG signals (see for example Bruyns-Haylett et al. [2017])  
617 [Cohen, 2017].

618 Today, we have a reasonably good understanding of how single neurons operate, that is, how  
619 they respond to synaptic input, and how multitudes of synaptic inputs combine to produce action po-  
620 tentials [Einevoll et al., 2019]. Similarly, we can, to a high degree, explain the measurement physics  
621 of EEG/MEG, that is, how neural currents affect electromagnetic brain signals recorded outside of  
622 the head [Nunez and Srinivasan, 2006; Cohen, 2017; Ilmoniemi and Sarvas, 2019]. The challenge  
623 of understanding EEG/MEG signals is therefore closely related to the greatest challenge in mod-  
624 ern neuroscience: understanding neural networks. Making sense of such complicated dynamical  
625 systems typically requires computational modeling [Einevoll et al., 2019], but the complexity of neu-  
626 rons, and the complexity and size of the neural networks involved in even the simplest of cognitive  
627 tasks, makes this a daunting challenge. The steady increase in available computing power, in com-  
628 bination with the ever-increasing knowledge on synaptic connectivity patterns is, however, making  
629 this approach more and more attractive [Reimann et al., 2013; Egger et al., 2014; Markram et al.,  
630 2015; Hagen et al., 2016; Gratiy et al., 2018; Arkhipov et al., 2018; Reimann et al., 2019; Billeh  
631 et al., 2020]: Today, there are several ongoing research projects pursuing such modeling efforts,  
632 for example at the Allen Institute for Brain Science and in the Human Brain Project [Einevoll et al.,  
633 2019]. While biophysically detailed, large-scale neural simulations are still in their infancy, we ex-  
634 pect these simulations to become an increasingly important research tool in neuroscience [Einevoll  
635 et al., 2019]. The presently described method enables EEG/MEG simulations combining detailed  
636 neural simulations with realistic head models. We believe that this approach will help shedding light  
637 on the neural origin of EEG/MEG signals, and help us take full advantage of these important brain  
638 signals in the future.

## 639 Acknowledgements

640 This work received funding from the European Union Horizon 2020 Research and Innovation  
641 Programme under Grant Agreement No. 785907 and No. 945539 [Human Brain Project (HBP)  
642 SGA2 and SGA3], the Norwegian Ministry of Education and Research through the SUURPh Pro-  
643 gramme and the Norwegian Research Council (NFR) through COBRA (No. 250128), NOTUR (No.  
644 NN4661K) and DigiBrain (No: 248828).

## 645 References

- 646 Ahlfors, S.P., Wreh II, C., 2015. Modeling the effect of dendritic input location on meg and eeg source dipoles. *Med Biol Eng*  
647 *Comput.* 53, 879–887. doi:[10.1007/s11517-015-1296-5](https://doi.org/10.1007/s11517-015-1296-5).
- 648 Arkhipov, A., Gouwens, N.W., Billeh, Y.N., Gratiy, S., Iyer, R., Wei, Z., Xu, Z., Abbasi-Asl, R., Berg, J., Buice, M., Cain,  
649 N., da Costa, N., de Vries, S., Denman, D., Durand, S., Feng, D., Jarsky, T., Lecoq, J., Lee, B., Li, L., Mihalas, S.,  
650 Ocker, G.K., Olsen, S.R., Reid, R.C., Soler-Llavina, G., Sorensen, S.A., Wang, Q., Waters, J., Scanziani, M., Koch,  
651 C., 2018. Visual physiology of the layer 4 cortical circuit in silico. *PLOS Computational Biology* 14, e1006535. URL:  
652 <http://dx.plos.org/10.1371/journal.pcbi.1006535>, doi:[10.1371/journal.pcbi.1006535](https://doi.org/10.1371/journal.pcbi.1006535).
- 653 Billeh, Y.N., Cai, B., Gratiy, S.L., Dai, K., Iyer, R., Gouwens, N.W., Abbasi-Asl, R., Jia, X., Siegle, J.H., Olsen, S.R., Koch,  
654 C., Mihalas, S., Arkhipov, A., 2020. Systematic Integration of Structural and Functional Data into Multi-Scale Models  
655 of Mouse Primary Visual Cortex. *Neuron* 106, 1–16. URL: <https://doi.org/10.1016/j.neuron.2020.01.040>,  
656 doi:[10.2139/ssrn.3416643](https://doi.org/10.2139/ssrn.3416643).
- 657 Blomquist, P., Devor, A., Indahl, U.G., Ulbert, I., Einevoll, G.T., Dale, A.M., 2009. Estimation of thalamocortical and intra-  
658 cortical network models from joint thalamic single-electrode and cortical laminar-electrode recordings in the rat barrel  
659 system. *PLoS Computational Biology* 5. doi:[10.1371/journal.pcbi.1000328](https://doi.org/10.1371/journal.pcbi.1000328).
- 660 Bojak, I., Oostendorp, T.F., Reid, A.T., Kötter, R., 2010. Connecting mean field models of neural activity to EEG and fMRI  
661 data. *Brain Topography* 23, 139–149. doi:[10.1007/s10548-010-0140-3](https://doi.org/10.1007/s10548-010-0140-3).
- 662 Brunel, N., 2000. Dynamics of sparsely connected networks of excitatory and inhibitory neurons. *Journal of Computational*  
663 *Neuroscience* 8, 183–208.
- 664 Bruyns-Haylett, M., Luo, J., Kennerley, A.J., Harris, S., Boorman, L., Milne, E., Vautrelle, N., Hayashi, Y., Whalley,  
665 B.J., Jones, M., Berwick, J., Riera, J., Zheng, Y., 2017. The neurogenesis of p1 and n1: a concurrent eeg/lfp  
666 study. *NeuroImage* 146, 575–588. URL: <http://dx.doi.org/10.1016/j.neuroimage.2016.09.034>, doi:[10.1017/](https://doi.org/10.1017/CB09781107415324.004)  
667 [CB09781107415324.004](https://doi.org/10.1017/CB09781107415324.004), arXiv:arXiv:1011.1669v3.
- 668 Buzsáki, G., Anastassiou, C.A., Koch, C., 2012. The origin of extracellular fields and currents—eeg, ecog, lfp and spikes.  
669 *Nature reviews. Neuroscience* 13, 407–20. URL: <http://www.ncbi.nlm.nih.gov/pubmed/22595786>, doi:[10.1038/](https://doi.org/10.1038/nrn3241)  
670 [nrn3241](https://doi.org/10.1038/nrn3241).
- 671 Carnevale, N.T., Hines, M.L., 2006. *The NEURON Book*. Cambridge University Press, Cambridge.
- 672 Chatzikalymniou, A.P., Skinner, F.K., 2018. Deciphering the contribution of oriens-lacunosum/ moleculare (OLM) cells to  
673 intrinsic  $\theta$  rhythms using biophysical local field potential (LFP) models. *eNeuro* 5. doi:[10.1523/ENEURO.0146-18.2018](https://doi.org/10.1523/ENEURO.0146-18.2018).
- 674 Cohen, M.X., 2017. Where Does EEG Come From and What Does It Mean? *Trends in Neurosciences* 40, 208–218. URL:  
675 <http://linkinghub.elsevier.com/retrieve/pii/S0166223617300243>, doi:[10.1016/j.tins.2017.02.004](https://doi.org/10.1016/j.tins.2017.02.004).
- 676 Coombes, S., 2006. Neural fields. *Scholarpedia* 1, 1373. doi:[10.4249/scholarpedia.1373](https://doi.org/10.4249/scholarpedia.1373). revision #138631.
- 677 Dale, A.M., Fischl, B., Sereno, M.I., 1999. Cortical Surface-Based Analysis Segmentation, I Reconstruction, Surface.  
678 *NeuroImage* 9, 179–194.
- 679 David, O., Friston, K.J., 2003. A neural mass model for MEG/EEG: Coupling and neuronal dynamics. *NeuroImage* 20,  
680 1743–1755. doi:[10.1016/j.neuroimage.2003.07.015](https://doi.org/10.1016/j.neuroimage.2003.07.015).
- 681 Deco, G., Jirsa, V.K., Robinson, P.A., Breakspear, M., Friston, K., 2008. The dynamic brain: From spiking neurons to neural  
682 masses and cortical fields. *PLoS Computational Biology* 4. doi:[10.1371/journal.pcbi.1000092](https://doi.org/10.1371/journal.pcbi.1000092).

- 683 Dmochowski, J.P., Koessler, L., Norcia, A.M., Bikson, M., Parra, L.C., 2017. Optimal use of eeg recordings to target active  
684 brain areas with transcranial electrical stimulation. *NeuroImage* 157, 69–80. URL: [http://dx.doi.org/10.1016/j.](http://dx.doi.org/10.1016/j.neuroimage.2017.05.059)  
685 [neuroimage.2017.05.059](http://dx.doi.org/10.1016/j.neuroimage.2017.05.059), doi:10.1016/j.neuroimage.2017.05.059.
- 686 Egger, R., Dercksen, V.J., Udvary, D., Hege, H.C., Oberlaender, M., 2014. Generation of dense statistical connectomes from  
687 sparse morphological data. *Frontiers in Neuroanatomy* 8, 1–18. URL: [http://www.frontiersin.org/Neuroanatomy/](http://www.frontiersin.org/Neuroanatomy/10.3389/fnana.2014.00129/abstract)  
688 [10.3389/fnana.2014.00129/abstract](http://www.frontiersin.org/Neuroanatomy/10.3389/fnana.2014.00129/abstract), doi:10.3389/fnana.2014.00129.
- 689 Einevoll, G.T., Destexhe, A., Diesmann, M., Grün, S., Jirsa, V., de Kamps, M., Migliore, M., Ness, T.V., Plesser, H.E.,  
690 Schürmann, F., 2019. The scientific case for brain simulations. *Neuron* 102, 735–744. doi:10.1016/j.neuron.2019.  
691 03.027.
- 692 Einevoll, G.T., Kayser, C., Logothetis, N.K., Panzeri, S., 2013a. Modelling and analysis of local field potentials for studying  
693 the function of cortical circuits. *Nature Reviews, Neuroscience* 14.
- 694 Einevoll, G.T., Lindén, H., Tetzlaff, T., Łęski, S., Pettersen, K.H., (Ed), R.Q.Q., (Ed), S.P., 2013b. Principles of Neural Coding,  
695 Local Field Potentials Biophysical Origin and Analysis. CRC Press, Florida.
- 696 Einevoll, G.T., Pettersen, K.H., Devor, A., Ulbert, I., Halgren, E., Dale, A.M., 2007. Laminar population analysis: estimating  
697 firing rates and evoked synaptic activity from multielectrode recordings in rat barrel cortex. *J Neurophysiol* 97, 2174–2190.  
698 URL: <http://dx.doi.org/10.1152/jn.00845.2006>, doi:10.1152/jn.00845.2006.
- 699 Eyal, G., Verhoog, M.B., Testa-Silva, G., Deitcher, Y., Benavides-Piccione, R., DeFelipe, J., De Kock, C.P., Mansvelder, H.D.,  
700 Segev, I., 2018. Human cortical pyramidal neurons: From spines to spikes via models. *Frontiers in cellular neuroscience*  
701 12, 181.
- 702 Eyal, G., Verhoog, M.B., Testa-Silva, G., Deitcher, Y., Lodder, J.C., Benavides-Piccione, R., Morales, J., DeFelipe, J.,  
703 de Kock, C.P., Mansvelder, H.D., Segev, I., 2016. Unique Membrane Properties and Enhanced Signal Processing in  
704 Human Neocortical Neurons. *e-Life* .
- 705 Freestone, D.R., Karoly, P.J., Peterson, A.D., Kuhlmann, L., Lai, A., Goodarzy, F., Cook, M.J., 2015. Seizure Predic-  
706 tion: Science Fiction or Soon to Become Reality? *Current Neurology and Neuroscience Reports* 15. doi:10.1007/  
707 s11910-015-0596-3.
- 708 Gentet, L.J., Stuart, G.J., Clements, J.D., 2000. Direct measurement of specific membrane capacitance in neurons. *Bio-*  
709 *physical journal* 79, 314–320.
- 710 Gramfort, A., Luessi, M., Larson, E., Engemann, D.A., Strohmeier, D., Brodbeck, C., Parkkonen, L., Hämäläinen, M.S.,  
711 2014. MNE software for processing MEG and EEG data. *NeuroImage* 86, 446–460. URL: [http://dx.doi.org/10.](http://dx.doi.org/10.1016/j.neuroimage.2013.10.027)  
712 [1016/j.neuroimage.2013.10.027](http://dx.doi.org/10.1016/j.neuroimage.2013.10.027), doi:10.1016/j.neuroimage.2013.10.027.
- 713 Gratiy, S.L., Billeh, Y.N., Dai, K., Mitelut, C., Feng, D., Gouwens, N.W., Cain, N., Koch, C., Anastassiou, C.A., Arkipov,  
714 A., 2018. BioNet: A Python interface to NEURON for modeling large-scale networks. *PLoS One* 13, e0201630. URL:  
715 <http://dx.plos.org/10.1371/journal.pone.0201630>, doi:10.1371/journal.pone.0201630.
- 716 Griffiths, D.J., 1999. Introduction to electromagnetism. Prentice-Hall, Englewood Cliffs, NJ, 1989) Section 10, P429.
- 717 Hagen, E., Dahmen, D., Stavrinou, M.L., Lindén, H., Tetzlaff, T., Van Albada, S.J., Grün, S., Diesmann, M., Einevoll, G.T.,  
718 2016. Hybrid scheme for modeling local field potentials from point-neuron networks. *Cerebral Cortex* 26, 4461–4496.  
719 doi:10.1093/cercor/bhw237, [arXiv:1511.01681](https://arxiv.org/abs/1511.01681).
- 720 Hagen, E., Næss, S., Ness, T.V., Einevoll, G.T., 2018. Multimodal modeling of neural network activity: computing LFP,  
721 ECoG, EEG and MEG signals with LFPy 2.0. *Front Neuroinform* 12. doi:10.3389/fninf.2018.00092.
- 722 Hagen, E., Næss, S., Ness, T.V., Einevoll, G.T., 2019. LFPy – multimodal modeling of extracellular neuronal recordings in  
723 Python, in: *Encyclopedia of Computational Neuroscience*. Springer, New York, NY, p. 620286. URL: [https://doi.org/](https://doi.org/10.1007/978-1-4614-7320-6_100681-1)  
724 [10.1007/978-1-4614-7320-6\\_100681-1](https://doi.org/10.1007/978-1-4614-7320-6_100681-1), doi:[https://doi.org/10.1007/978-1-4614-7320-6\\_100681-1](https://doi.org/10.1007/978-1-4614-7320-6_100681-1).
- 725 Hämäläinen, M., Haari, R., Ilmoniemi, R.J., Knuutila, J., Lounasmaa, O.V., 1993. Magnetoencephalography — theory,  
726 instrumentation, and application to noninvasive studies of the working human brain. *Reviews of Modern Physics* 65.
- 727 Haufe, S., Huang, Y., Parra, L.C., 2015. A highly detailed FEM volume conductor model based on the ICBM152 average  
728 head template for EEG source imaging and TCS targeting. *Conf proc IEEE Eng Med Biol Soc* 2015, 5744–5747. URL:  
729 <https://pubmed.ncbi.nlm.nih.gov/26737597/>.



- 730 Hay, E., Hill, S., Schürmann, F., Markram, H., Segev, I., 2011. Models of neocortical layer 5b pyramidal cells capturing a  
731 wide range of dendritic and perisomatic active properties. *PLoS computational biology* 7.
- 732 Holt, G.R., Koch, C., 1999. Electrical interactions via the extracellular potential near cell bodies. *Journal of Computational*  
733 *Neuroscience* 6.
- 734 Huang, Y., Dmochowski, J.P., Su, Y., Datta, A., Rorden, C., Parra, L.C., 2013. Automated mri segmentation for individualized  
735 modeling of current flow in the human head. *Journal of neural engineering* 10, 066004.
- 736 Huang, Y., Parra, L.C., 2015. Fully automated whole-head segmentation with improved smoothness and continuity, with  
737 theory reviewed. *PLoS ONE* 10, 1–34. doi:[10.1371/journal.pone.0125477](https://doi.org/10.1371/journal.pone.0125477).
- 738 Huang, Y., Parra, L.C., Haufe, S., 2016. The new york head—a precise standardized volume conductor model for eeg source  
739 localization and tes targeting. *NeuroImage* 140, 150–162. URL: <http://dx.doi.org/10.1016/j.neuroimage.2015.12.019>, doi:[10.1016/j.neuroimage.2015.12.019](https://doi.org/10.1016/j.neuroimage.2015.12.019).
- 741 Ilmoniemi, R.J., Sarvas, J., 2019. *Brain Signals: Physics and Mathematics of MEG and EEG*. MIT Press.
- 742 Jackson, J.D., 1998. *Classical electrodynamics*. Third ed., Wiley.
- 743 Jirsa, V.K., Jantzen, K.J., Fuchs, A., Kelso, J.A., 2002. Spatiotemporal forward solution of the EEG and MEG using network  
744 modeling. *IEEE Transactions on Medical Imaging* 21, 493–504. doi:[10.1109/TMI.2002.1009385](https://doi.org/10.1109/TMI.2002.1009385).
- 745 Jones, S.R., Pritchett, D.L., Sikora, M.a., Stufflebeam, S.M., Hämäläinen, M., Moore, C.I., 2009. Quantitative analysis  
746 and biophysically realistic neural modeling of the MEG mu rhythm: rhythmogenesis and modulation of sensory-evoked  
747 responses. *Journal of neurophysiology* 102, 3554–72. doi:[10.1152/jn.00535.2009](https://doi.org/10.1152/jn.00535.2009).
- 748 Jones, S.R., Pritchett, D.L., Stufflebeam, S.M., Hämäläinen, M., Moore, C.I., 2007. Neural correlates of tactile detection:  
749 A combined magnetoencephalography and biophysically based computational modeling study. *Journal of Neuroscience*  
750 27, 10751–10764. doi:[10.1523/JNEUROSCI.0482-07.2007](https://doi.org/10.1523/JNEUROSCI.0482-07.2007).
- 751 Kalmbach, B.E., Buchin, A., Long, B., Close, J., Nandi, A., Miller, J.A., Bakken, T.E., Hodge, R.D., Chong, P., de Frates, R.,  
752 Dai, K., Maltzer, Z., Nicovich, P.R., Keene, C.D., Silbergeld, D.L., Gwinn, R.P., Cobbs, C., Ko, A.L., Ojemann, J.G., Koch,  
753 C., Anastassiou, C.A., Lein, E.S., Ting, J.T., 2018. h-Channels Contribute to Divergent Intrinsic Membrane Properties  
754 of Supragranular Pyramidal Neurons in Human versus Mouse Cerebral Cortex. *Neuron* 100, 1194–1208.e5. URL:  
755 <https://doi.org/10.1016/j.neuron.2018.10.012>, doi:[10.1016/j.neuron.2018.10.012](https://doi.org/10.1016/j.neuron.2018.10.012).
- 756 Klimesch, W., Doppelmayr, M., Russegger, H., Pachinger, T., Schwaiger, J., 1998. Induced alpha band power changes in  
757 the human EEG and attention. *Neuroscience Letters* 244, 73–76. doi:[10.1016/S0304-3940\(98\)00122-0](https://doi.org/10.1016/S0304-3940(98)00122-0).
- 758 Koch, C., 1999. *Biophysics of Computation*. Oxford Univ Press, Oxford.
- 759 Light, G.A., Näätänen, R., 2013. Mismatch negativity is a breakthrough biomarker for understanding and treating psychotic  
760 disorders. *PNAS* 110, 15175–15176. doi:[10.1073/pnas.1313287110](https://doi.org/10.1073/pnas.1313287110).
- 761 Lindén, H., Pettersen, K.H., Einevoll, G.T., 2010. Intrinsic dendritic filtering gives low-pass power spectra of local field  
762 potentials. *Springer Science+Business Media* 29.
- 763 Linssen, C., Lepperød, M.E., Mitchell, J., Pronold, J., Eppler, J.M., Keup, C., Peyser, A., Kunkel, S., Weidel, P., Nodem,  
764 Y., Terhorst, D., Deepu, R., Deger, M., Hahne, J., Sinha, A., Antoniotti, A., Schmidt, M., Paz, L., Garrido, J., Ippen, T.,  
765 Riquelme, L., Serenko, A., Kühn, T., Kitayama, I., Mørk, H., Spreizer, S., Jordan, J., Krishnan, J., Senden, M., Hagen, E.,  
766 Shusharin, A., Vennemo, S.B., Rodarie, D., Morrison, A., Graber, S., Schuecker, J., Diaz, S., Zajzon, B., Plesser, H.E.,  
767 2018. *Nest* 2.16.0. URL: <https://doi.org/10.5281/zenodo.1400175>, doi:[10.5281/zenodo.1400175](https://doi.org/10.5281/zenodo.1400175).
- 768 Logg, A., Mardal, K.a., Wells, G.N., 2012. Automated Solution of Differential Equations by the Finite Element Method.  
769 volume 84 of *Lecture Notes in Computational Science and Engineering*. Springer Berlin Heidelberg, Berlin, Heidelberg.  
770 doi:[10.1007/978-3-642-23099-8](https://doi.org/10.1007/978-3-642-23099-8).
- 771 Lopes da Silva, F., 2013. EEG and MEG: Relevance to neuroscience. *Neuron* 80, 1112–1128. URL: <http://linkinghub.elsevier.com/retrieve/pii/S0896627313009203>, doi:[10.1016/j.neuron.2013.10.017](https://doi.org/10.1016/j.neuron.2013.10.017).
- 773 Luo, J., Macias, S., Ness, T.V., Einevoll, G.T., Zhang, K., Moss, C.F., 2018. Neural timing of stimulus events with microsecond  
774 precision. *PLoS biology* 16, 1–22.
- 775 Mainen, Z.F., Sejnowski, T.J., 1996. Influence of dendritic structure on firing pattern in model neocortical neurons. *Nature*  
776 382.

- 777 Mäki-Marttunen, T., Kaufmann, T., Elvsåshagen, T., Devor, A., Djurovic, S., Westlye, L.T., Linne, M.I., Rietschel, M., Schu-  
778 bert, D., Borgwardt, S., Efrim-budisteanu, M., Bettella, F., Halmes, G., Hagen, E., 2019a. Biophysical Psychiatry—How  
779 Computational Neuroscience Can Help to Understand the Complex Mechanisms of Mental Disorders. *Frontiers in Psy-*  
780 *chiatry* 10, 1–14. doi:[10.3389/fpsy.2019.00534](https://doi.org/10.3389/fpsy.2019.00534).
- 781 Mäki-Marttunen, T., Krull, F., Bettella, F., Hagen, E., Næss, S., Ness, T.V., Moberget, T., Elvsåshagen, T., Metzner, C.,  
782 Devor, A., et al., 2019b. Alterations in schizophrenia-associated genes can lead to increased power in delta oscillations.  
783 *Cerebral Cortex* 29, 875–891.
- 784 Malmivuo, J., Plonsey, R., 1995. *Bioelectromagnetism - Principles and Applications of Bioelectric and Biomagnetic Fields*.  
785 Oxford University Press.
- 786 Markram, H., Muller, E., Ramaswamy, S., Reimann, M.W., Abdellah, M., Sanchez, C.A., Ailamaki, A., Alonso-Nanclares,  
787 L., Antille, N., Arsever, S., Kahou, G.A.A., Berger, T.K., Bilgili, A., Buncic, N., Chalimourda, A., Chindemi, G., Courcol,  
788 J.D., Delalondre, F., Delattre, V., Druckmann, S., Dumusc, R., Dynes, J., Eilemann, S., Gal, E., Gevaert, M.E., Ghobril,  
789 J.P., Gidon, A., Graham, J.W., Gupta, A., Haenel, V., Hay, E., Heinis, T., Hernando, J.B., Hines, M., Kanari, L., Keller,  
790 D., Kenyon, J., Khazen, G., Kim, Y., King, J.G., Kisvarday, Z., Kumbhar, P., Lasserre, S., Le Bé, J.V., Magalhães, B.R.,  
791 Merchán-Pérez, A., Meystre, J., Morrice, B.R., Muller, J., Muñoz-Céspedes, A., Muralidhar, S., Muthurasa, K., Nachbaur,  
792 D., Newton, T.H., Nolte, M., Ovcharenko, A., Palacios, J., Pastor, L., Perin, R., Ranjan, R., Riachi, I., Rodríguez, J.R.,  
793 Riquelme, J.L., Rössert, C., Sfyakis, K., Shi, Y., Shillcock, J.C., Silberberg, G., Silva, R., Tauheed, F., Telefont, M.,  
794 Toledo-Rodriguez, M., Tränkler, T., Van Geit, W., Díaz, J.V., Walker, R., Wang, Y., Zaninetta, S.M., DeFelipe, J., Hill, S.L.,  
795 Segev, I., Schürmann, F., 2015. Reconstruction and simulation of neocortical microcircuitry. *Cell* 163, 456–492. URL:  
796 <http://linkinghub.elsevier.com/retrieve/pii/S0092867415011915>, doi:[10.1016/j.cell.2015.09.029](https://doi.org/10.1016/j.cell.2015.09.029).
- 797 Mazzoni, A., Lindèn, H., Cuntz, H., Lansner, A., Panzeri, S., Einevoll, G.T., 2015. Computing the Local Field Potential (LFP)  
798 from Integrate-and-Fire Network Models. *PLOS Computational Biology* 11, e1004584. URL: [http://dx.plos.org/10.](http://dx.plos.org/10.1371/journal.pcbi.1004584)  
799 [1371/journal.pcbi.1004584](https://doi.org/10.1371/journal.pcbi.1004584), doi:[10.1371/journal.pcbi.1004584](https://doi.org/10.1371/journal.pcbi.1004584).
- 800 McColgan, T., Liu, J., Kuokkanen, P.T., Carr, C.E., Wagner, H., Kempster, R., 2017. Dipolar extracellular potentials generated  
801 by axonal projections. *eLife* 6, e26106. URL: <https://elifesciences.org/articles/26106>, doi:[10.7554/eLife.](https://doi.org/10.7554/eLife.26106)  
802 [26106](https://doi.org/10.7554/eLife.26106).
- 803 Miceli, S., Ness, T.V., Einevoll, G.T., Schubert, D., 2017. Impedance Spectrum in Cortical Tissue: Implications for Propa-  
804 gation of LFP Signals on the Microscopic Level. *eNeuro* 4, 1–15. URL: [http://eneuro.org/content/4/1/ENEURO.](http://eneuro.org/content/4/1/ENEURO.0291-16.2016.abstract)  
805 [0291-16.2016.abstract](https://doi.org/10.1523/ENEURO.0291-16.2016.abstract).
- 806 Murakami, S., Hirose, A., Okada, Y.C., 2003. Contribution of ionic currents to magnetoencephalography (MEG) and  
807 electroencephalography (EEG) signals generated by guinea-pig CA3 slices. *The Journal of physiology* 553, 975–85.  
808 doi:[10.1113/jphysiol.2003.051144](https://doi.org/10.1113/jphysiol.2003.051144).
- 809 Murakami, S., Okada, Y., 2006. Contributions of principal neocortical neurons to magnetoencephalography and electroen-  
810 cephalography signals. *The Journal of physiology* 575, 925–36. doi:[10.1113/jphysiol.2006.105379](https://doi.org/10.1113/jphysiol.2006.105379).
- 811 Murakami, S., Zhang, T., Hirose, a., Okada, Y.C., 2002. Physiological origins of evoked magnetic fields and extracellular  
812 field potentials produced by guinea-pig CA3 hippocampal slices. *The Journal of Physiology* 544, 237–251. doi:[10.1113/](https://doi.org/10.1113/jphysiol.2002.027094)  
813 [jphysiol.2002.027094](https://doi.org/10.1113/jphysiol.2002.027094).
- 814 Ness, T.V., Remme, M.W.H., Einevoll, G.T., 2016. Active subthreshold dendritic conductances shape the local field potential.  
815 *Journal of Physiology* 594, 3809–3825. URL: [https://physoc.onlinelibrary.wiley.com/doi/full/10.1113/](https://physoc.onlinelibrary.wiley.com/doi/full/10.1113/JP272022)  
816 [JP272022](https://doi.org/10.1113/JP272022), doi:[10.1113/JP272022](https://doi.org/10.1113/JP272022), [arXiv:1512.04293](https://arxiv.org/abs/1512.04293).
- 817 Ness, T.V., Remme, M.W.H., Einevoll, G.T., 2018. h-type membrane current shapes the local field potential from populations  
818 of pyramidal neurons. *Journal of Neuroscience* 38, 6011–6024. URL: [http://www.jneurosci.org/lookup/doi/10.](http://www.jneurosci.org/lookup/doi/10.1523/JNEUROSCI.3278-17.2018)  
819 [1523/JNEUROSCI.3278-17.2018](https://doi.org/10.1523/JNEUROSCI.3278-17.2018), doi:[10.1523/JNEUROSCI.3278-17.2018](https://doi.org/10.1523/JNEUROSCI.3278-17.2018).
- 820 Neymotin, S.A., Daniels, D.S., Caldwell, B., McDougal, R.A., Carnevale, N.T., Jas, M., Moore, C.I., Hines, M.L., Hämäläinen,  
821 M., Jones, S.R., 2020. Human neocortical neurosolver (hnn), a new software tool for interpreting the cellular and network  
822 origin of human meg/eeg data. *eLife* 9, e51214.
- 823 Niedermeyer, E., 2003. The clinical relevance of EEG interpretation. *CLINICAL ELECTROENCEPHALOGRAPHY* 34,  
824 93–98. doi:<https://doi.org/10.1177/155005940303400303>.
- 825 Næss, S., Chintaluri, C., Ness, T.V., M.Dale, A., Einevoll, G.T., Wójcik, D., 2017. Four-sphere head model for EEG signals  
826 revisited. *Frontiers in Human Neuroscience* .

- 827 Nunez, P.L., Srinivasan, R., 2006. *Electric Fields of the Brain*. 2nd ed., Oxford University Press, New York.
- 828 Palva, S., Palva, J.M., 2011. Functional roles of alpha-band phase synchronization in local and large-scale cortical networks.  
829 *Frontiers in Psychology* 2, 1–15. doi:10.3389/fpsyg.2011.00204.
- 830 Pesaran, B., Vinck, M., Einevoll, G.T., Sirota, A., Fries, P., Siegel, M., Truccolo, W., Schroeder, C.E., Srinivasan, R., 2018. In-  
831 vestigating large-scale brain dynamics using field potential recordings : Analysis and interpretation. *Nature Neuroscience*  
832 21, 903–919. URL: <http://dx.doi.org/10.1038/s41593-018-0171-8>, doi:10.1038/s41593-018-0171-8.
- 833 Pettersen, K., Lindén, H., Tetzlaff, T., Einevoll, G.T., 2014. Power laws from linear neuronal cable theory: Power spectral  
834 densities of the soma potential, soma membrane current and single-neuron contribution to the EEG. *PLoS Comput Biol*  
835 10.
- 836 Pettersen, K.H., Devor, A., Ulbert, I., Dale, A.M., Einevoll, G.T., 2006. Current-source density estimation based on inversion  
837 of electrostatic forward solution: effects of finite extent of neuronal activity and conductivity discontinuities. *Journal*  
838 *of neuroscience methods* 154, 116–33. URL: <http://www.ncbi.nlm.nih.gov/pubmed/16436298>, doi:10.1016/j.  
839 *jneumeth*.2005.12.005.
- 840 Pettersen, K.H., Einevoll, G.T., 2008. Amplitude variability and extracellular low-pass filtering of neuronal spikes. *Biophysical*  
841 *Journal* 94.
- 842 Pettersen, K.H., Lindén, H., Dale, A.M., Einevoll, G.T., 2012. Extracellular spikes and CSD. *Handbook of Neural Activity*  
843 *Measurement* .
- 844 Pfurtscheller, G., Cooper, R., 1975. Frequency dependence of the transmission of the EEG from cortex to scalp. *Electroen-*  
845 *cephalography and Clinical Neurophysiology* 38, 93–96. doi:10.1016/0013-4694(75)90215-1.
- 846 Potjans, T.C., Diesmann, M., 2014. The cell-type specific cortical microcircuit: relating structure and activity in a full-scale  
847 spiking network model. *Cerebral cortex* 24, 785–806. doi:10.1093/cercor/bhs358.
- 848 Ranta, R., Le Cam, S., Tyvaert, L., Louis-Dorr, V., 2017. Assessing human brain impedance using simultaneous surface  
849 and intracerebral recordings. *Neuroscience* 343, 411–422. doi:10.1016/j.neuroscience.2016.12.013.
- 850 Reimann, M.W., Anastassiou, C.A., Perin, R., Hill, S.L., Markram, H., Koch, C., 2013. A biophysically detailed model  
851 of neocortical local field potentials predicts the critical role of active membrane currents. *Neuron* 79, 375–390. URL:  
852 <http://linkinghub.elsevier.com/retrieve/pii/S0896627313004431>, doi:10.1016/j.neuron.2013.05.023.
- 853 Reimann, M.W., Gevaert, M., Shi, Y., Lu, H., Markram, H., Müller, E., 2019. A null model of the mouse whole-neocortex  
854 micro-connectome. *Nature communications* 10, 1–38.
- 855 Ritter, P., Schirner, M., McIntosh, A.R., Jirsa, V.K., 2013. The Virtual Brain Integrates Computational Modeling and Multi-  
856 modal Neuroimaging. *Brain Connectivity* 3, 121–145. doi:10.1089/brain.2012.0120.
- 857 Rush, S., Driscoll, D.A., 1969. Eeg electrode sensitivity-an application of reciprocity. *IEEE transactions on biomedical*  
858 *engineering* BME-16, 15–22.
- 859 Sahin, M., Jones, S.R., Sweeney, J.A., Berry-Kravis, E., Connors, B.W., Ewen, J.B., Hartman, A.L., Levin, A.R., Potter, W.Z.,  
860 Mamounas, L.A., 2019. Discovering translational biomarkers in neurodevelopmental disorders. *Nature Reviews Drug*  
861 *Discovery* 18, 235–236. doi:10.1038/d41573-018-00010-7.
- 862 Sanz-Leon, P., Knock, S.A., Spiegler, A., Jirsa, V.K., 2015. Mathematical framework for large-scale brain network modeling  
863 in The Virtual Brain. *NeuroImage* 111, 385–430. URL: <http://dx.doi.org/10.1016/j.neuroimage.2015.01.002>,  
864 doi:10.1016/j.neuroimage.2015.01.002.
- 865 Sanz-Leon, P., Knock, S.A., Woodman, M.M., Domide, L., Mersmann, J., McIntosh, A.R., Jirsa, V., 2013. The virtual brain:  
866 A simulator of primate brain network dynamics. *Frontiers in Neuroinformatics* 7. doi:10.3389/fninf.2013.00010.
- 867 Schmidt, M., Bakker, R., Shen, K., Bezgin, G., Diesmann, M., van Albada, S.J., 2018. A multi-scale layer-resolved spiking  
868 network model of resting-state dynamics in macaque visual cortical areas. *PLoS Computational Biology* 14, 1–38.  
869 doi:10.1371/journal.pcbi.1006359.
- 870 Senk, J., Hagen, E., van Albada, S.J., Diesmann, M., 2018. Reconciliation of weak pairwise spike-train correlations  
871 and highly coherent local field potentials across space. *arXiv* , 1–44URL: <http://arxiv.org/abs/1805.10235>,  
872 [arXiv:1805.10235](https://arxiv.org/abs/1805.10235).

- 873 Seo, H., Kim, D., Jun, S.C., 2016. Effect of Anatomically Realistic Full-Head Model on Activation of Cortical Neurons  
874 in Subdural Cortical Stimulation-A Computational Study. *Scientific Reports* 6, 1–12. URL: [http://dx.doi.org/10.](http://dx.doi.org/10.1038/srep27353)  
875 [1038/srep27353](http://dx.doi.org/10.1038/srep27353), doi:10.1038/srep27353.
- 876 Siegel, M., Donner, T.H., Engel, A.K., 2012. Spectral fingerprints of large-scale neuronal interactions. *Nature Reviews*  
877 *Neuroscience* 13, 121–134. doi:10.1038/nrn3137.
- 878 Skaar, J.E.W., Stasik, A.J., Hagen, E., Ness, T.V., Einevoll, G.T., 2020. Estimation of neural network model parameters from  
879 local field potentials (LFPs). *PLoS Computational Biology* 16, e1007725. URL: [https://doi.org/10.1371/journal.](https://doi.org/10.1371/journal.pcbi.1007725)  
880 [pcbi.1007725](https://doi.org/10.1371/journal.pcbi.1007725), doi:10.1101/564765.
- 881 Sliva, D.D., Black, C.J., Bowary, P., Agrawal, U., Santoyo, J.F., Philip, N.S., Greenberg, B.D., Moore, C.I., Jones, S.R., 2018.  
882 A prospective study of the impact of transcranial alternating current stimulation on EEG correlates of somatosensory  
883 perception. *Frontiers in Psychology* 9, 1–17. doi:10.3389/fpsyg.2018.02117.
- 884 Srinivasan, R., Nunez, P.L., Silberstein, R.B., 1998. Spatial filtering and neocortical dynamics: estimates of EEG coherence.  
885 *IEEE Transactions on Biomedical Engineering* .
- 886 Sterratt, D., Graham, B., Gillies, A., Willshaw, D., 2011. *Principles of Computational Modeling in Neuroscience*. Cambridge  
887 University Press, Cambridge.
- 888 Suzuki, M., Larkum, M.E., 2017. Dendritic calcium spikes are clearly detectable at the cortical surface. *Nature Communi-*  
889 *cations* 8, 1–10. URL: <http://dx.doi.org/10.1038/s41467-017-00282-4>, doi:10.1038/s41467-017-00282-4.
- 890 Teleńczuk, B., Baker, S.N., Kempster, R., Curio, G., 2015. Correlates of a single cortical action potential in the epidural  
891 EEG. *NeuroImage* 109, 357–367. URL: <http://linkinghub.elsevier.com/retrieve/pii/S1053811914010623>,  
892 doi:10.1016/j.neuroimage.2014.12.057.
- 893 Teleńczuk, B., Quyen, M.L.V., Cash, S.S., Hatsopoulos, N.G., Destexhe, A., Neurosciences, D., National, C., Recherche, D.,  
894 2017. Local field potentials primarily reflect inhibitory neuron activity in human and monkey cortex. *Scientific Reports* 7,  
895 1–16. URL: <http://dx.doi.org/10.1038/srep40211>, doi:10.1101/052282.
- 896 Teleńczuk, B., Teleńczuk, M., Destexhe, A., 2020. A kernel-based method to calculate local field potentials from networks  
897 of spiking neurons. *bioRxiv* , 1–20.
- 898 Teleńczuk, M., Teleńczuk, B., Destexhe, A., 2019. Modeling unitary fields and the single-neuron contribution to local  
899 field potentials in the hippocampus. *bioRxiv* , 602953 URL: <https://www.biorxiv.org/content/10.1101/602953v2>,  
900 doi:10.1101/602953.
- 901 Uhlirva, H., Kilic, K., Tian, P., Sakadz, S., Saisan, P.A., Gagnon, L., Thunemann, M., Nizar, K., Yasseen, M.A., Jr, D.J.H.,  
902 Vandenberghe, M., Djurovic, S., Andreassen, O.A., Silva, G.A., Masliah, E., Kleinfeld, D., Vinogradov, S., Buxton, R.B.,  
903 Einevoll, G.T., Boas, D.A., Dale, A.M., Devor, A., Devor, A., 2016. The roadmap for estimation of cell-type-  
904 neuronal activity from non- invasive measurements. *Proceedings Of The Royal Society Of London. Series B Biological*  
905 *Sciences* 371. doi:10.1098/rstb.2015.0356.
- 906 Vorwerk, J., Cho, J.H., Rampp, S., Hamer, H., Knösche, T.R., Wolters, C.H., 2014. A guideline for head volume conductor  
907 modeling in eeg and meg. *NeuroImage* 100, 590–607. URL: [http://dx.doi.org/10.1016/j.neuroimage.2014.06.](http://dx.doi.org/10.1016/j.neuroimage.2014.06.040)  
908 [040](http://dx.doi.org/10.1016/j.neuroimage.2014.06.040), doi:10.1016/j.neuroimage.2014.06.040.
- 909 Vorwerk, J., Hanrath, A., Wolters, C.H., Grasedyck, L., 2019. The multipole approach for EEG forward modeling using the  
910 finite element method. *NeuroImage* 201, 116039. URL: <https://doi.org/10.1016/j.neuroimage.2019.116039>,  
911 doi:10.1016/j.neuroimage.2019.116039.
- 912 Ziegler, E., Chellappa, S.L., Gaggioni, G., Ly, J.Q., Vandewalle, G., André, E., Geuzaine, C., Phillips, C., 2014. A finite-  
913 element reciprocity solution for EEG forward modeling with realistic individual head models. *NeuroImage* 103, 542–  
914 551. URL: <http://linkinghub.elsevier.com/retrieve/pii/S1053811914007307>, doi:10.1016/j.neuroimage.  
915 [2014.08.056](http://linkinghub.elsevier.com/retrieve/pii/S1053811914007307).
